# Supplementary material for: Identification and Characterization of the Insecticidal Toxin “Makes Caterpillars Floppy” in Photorhabdus temperata M1021 Using a Cosmid Library
Source: PubMed Central journal article supplement (PMC4113739; doi:10.3390/toxins6072024), 2014-07-10
Supplement: toxins-06-02024-s001.pdf [file toxins-06-02024-s001.pdf]

# Supplementary Files

**Table S1.** First PtC screening, to detect the insecticidal activity.

| Series A<br>Batch no. | Plate no. | Mortality of Larvae (Time in Days) |        |        | Phenotype of Larvae |
|-----------------------|-----------|------------------------------------|--------|--------|---------------------|
|                       |           | 1 day                              | 2 days | 3 days |                     |
| A5                    | 10        | -                                  | -      | 4/4 *  | Black               |
|                       | 11        | 1/4                                | 1/4    | 2/4    | Black               |
|                       | 13        | -                                  | -      | 2/4    |                     |
|                       | 18        | -                                  | 1/4    | 1/4    |                     |
|                       | 24        | 1/4                                | 1/4    | 4/4    | Dark red            |
|                       | 28        | -                                  | -      | 3/4    | Black               |
|                       | 29        | 1/4                                | 2/4    | 3/4    |                     |
|                       | A6        | 1                                  | -      | 2/4    | 4/4                 |
| 2                     |           | 1/4                                | 1/4    | 2/4    | Error               |
| 4                     |           | 1/4                                | 1/4    | 2/4    |                     |
| 6                     |           | -                                  | 4/4    |        | Black spots         |
| 7                     |           | -                                  | 1/4    | 2/4    | Black/Black spots   |
| 11                    |           | 1/4                                | 1/4    | 2/4    | Black               |
| 12                    |           | -                                  | 1/4    | 3/4    | Dark red            |
| 13                    |           | -                                  | 2/4    | 4/4    | Dark red            |
| 14                    |           | -                                  | -      | 3/4    | Black               |
| 15                    |           | 1/4                                | 2/4    | 3/4    | Dark red Brown      |
| 16                    |           | 1/3                                | 3/3    |        | Error               |
| 17                    |           | 2/3                                | 3/3    |        | Dark brown          |
| 18                    |           | 1/3                                | 2/3    | 3/3    |                     |
| 19                    |           | 2/3                                | 3/3    |        | Black               |
| 20                    |           | 2/3                                | 3/3    |        | Black               |
| 21                    |           | 1/3                                | 3/3    |        | Stiff               |
| 22                    |           | -                                  | 3/3    |        | Black               |
| 23                    |           | -                                  | 3/3    |        | Black               |
| 24                    |           | -                                  | 3/3    |        | Reddish             |
| 25                    |           | 1/3                                | 2/3    | 2/3    | Black               |
| 26                    |           | -                                  | -      | -      |                     |
| 27                    |           | -                                  | 3/3    |        | Reddish             |
| 28                    |           | -                                  | -      | -      |                     |
| 29                    |           | 1/3                                | 1/3    | 1/3    |                     |
| 30                    |           | -                                  | -      | -      |                     |
| 31                    |           | -                                  | -      | -      |                     |
| 32                    |           | -                                  | 2/3    | 3/3    | Error               |
| 33                    |           | -                                  | -      | -      |                     |
| 34                    |           | -                                  | -      | -      |                     |
| 35                    |           | -                                  | -      | -      |                     |
| 36                    |           | 1/3                                | 2/3    | 2/3    |                     |
| 37                    |           | -                                  | -      | 2/3    |                     |
| 38                    |           | -                                  | -      | -      |                     |
| 39                    |           | -                                  | -      | 1/3    |                     |
| 40                    |           | 1/3                                | 1/3    | 2/3    | Black               |
| 41                    |           | -                                  | -      | -      |                     |
| 42                    |           | 2/3                                | 3/3    |        | Black               |
| 43                    |           | 2/4                                | 4/4    |        | Black               |

Table S1. *Cont.*

| Series A<br>Batch no. | Plate no. | Mortality of Larvae (Time in Days) |        |        | Phenotype of Larvae |
|-----------------------|-----------|------------------------------------|--------|--------|---------------------|
|                       |           | 1 day                              | 2 days | 3 days |                     |
|                       | 1         | -                                  | 3/3    |        | Black               |
|                       | 2         | 1/3                                | 1/3    | 3/3    | Black               |
|                       | 3         | -                                  | 3/3    |        | Black               |
|                       | 4         | 1/3                                | 2/3    | 2/3    | Black, Black spots  |
|                       | 5         | -                                  | 3/3    |        | Black               |
|                       | 6         | 2/3                                | 3/3    |        |                     |
|                       | 7         | -                                  | 3/3    |        | Black               |
|                       | 8         | -                                  | 3/3    |        | Black, Error        |
|                       | 9         | -                                  | 3/3    |        | Black spots         |
|                       | 10        | 3/3                                |        |        | Black spots         |
|                       | 11        | 2/3                                | 2/3    | 3/3    |                     |
|                       | 12        | -                                  | -      | -      |                     |
|                       | 13        | -                                  | -      | -      |                     |
|                       | 14        | -                                  | -      | -      |                     |
|                       | 15        | -                                  | -      | -      |                     |
|                       | 16        | -                                  | -      | -      |                     |
|                       | 17        | -                                  | -      | -      |                     |
|                       | 18        | 2/3                                | 2/3    | 2/3    |                     |
|                       | 19        | -                                  | -      | -      |                     |
|                       | 20        | 1/3                                | 1/3    | 1/3    | Dark red            |
|                       | 21        | -                                  | -      | -      |                     |
|                       | 22        | -                                  | -      | 1/3    |                     |
|                       | 23        | 1/3                                | 1/3    | 1/3    | Dark red            |
| A7                    | 24        | 1/3                                | 1/3    | 1/3    | Dark red            |
|                       | 25        | -                                  | -      | -      |                     |
|                       | 26        | 1/3                                | 1/3    | 3/3    | Black               |
|                       | 27        | -                                  | -      | 3/3    |                     |
|                       | 28        | 1/3                                | 1/3    | 1/3    |                     |
|                       | 29        | -                                  | -      | -      |                     |
|                       | 30        | -                                  | -      | -      |                     |
|                       | 31        | -                                  | -      | -      |                     |
|                       | 32        | 1/3                                | 1/3    | 1/3    |                     |
|                       | 33        | -                                  | -      | -      |                     |
|                       | 34        | -                                  | -      | -      |                     |
|                       | 35        | -                                  | 1/3    | 1/3    |                     |
|                       | 36        | -                                  | -      | -      |                     |
|                       | 37        | -                                  | -      | -      |                     |
|                       | 38        | 1/3                                | 1/3    | 1/3    |                     |
|                       | 39        | 1/3                                | 1/3    | 1/3    | Black               |
|                       | 40        | 2/3                                | 2/3    | 3/3    | black               |
|                       | 41        | -                                  | 2/3    | 3/3    | Error               |
|                       | 42        | -                                  | 1/3    | 2/3    | Error               |
|                       | 43        | 1/3                                | 2/3    | 2/3    | Black               |
|                       | 44        | -                                  | 1/3    | 1/3    | Black               |
|                       | 45        | -                                  | -      | -      |                     |
|                       | 46        | 1/3                                | 2/3    | 2/3    | Black               |

Table S1. *Cont.*

| Series A<br>Batch no. | Plate no. | Mortality of Larvae (Time in Days) |        |        | Phenotype of Larvae |
|-----------------------|-----------|------------------------------------|--------|--------|---------------------|
|                       |           | 1 day                              | 2 days | 3 days |                     |
|                       | 1         | -                                  | 1/3    | 1/3    | Black               |
|                       | 2         | 1/3                                | 2/3    | 3/3    | Black, black spots  |
|                       | 3         | -                                  | -      | 2/3    | Black               |
|                       | 4         | 3/3                                |        |        | Dark red            |
|                       | 5         | 1/3                                | 2/3    | 2/3    | Black               |
|                       | 6         | -                                  | 2/3    | 2/3    |                     |
|                       | 7         | -                                  | -      | 3/3    | Dark red            |
|                       | 8         | 2/3                                | 3/3    |        | Error               |
|                       | 9         | 2/3                                | 3/3    |        | Black               |
|                       | 10        | 1/3                                | 3/3    |        | Black               |
|                       | 11        | 1/3                                | 2/3    | 2/3    | Black               |
|                       | 12        | -                                  | 1/3    | 1/3    |                     |
|                       | 13        | -                                  | -      | -      |                     |
|                       | 14        | -                                  | -      | -      |                     |
|                       | 15        | -                                  | -      | -      |                     |
|                       | 16        | -                                  | -      | -      |                     |
|                       | 17        | -                                  | 3/3    |        | Dark red            |
|                       | 18        | -                                  | -      | -      |                     |
|                       | 19        | -                                  | -      | -      |                     |
|                       | 20        | -                                  | -      | -      |                     |
|                       | 21        | -                                  | -      | -      |                     |
|                       | 22        | -                                  | 1/3    | 1/3    | Black               |
| A8                    | 23        | -                                  | -      | -      |                     |
|                       | 24        | -                                  | 1/3    | 1/3    | Black               |
|                       | 25        | -                                  | -      | -      |                     |
|                       | 26        | -                                  | -      | -      |                     |
|                       | 27        | -                                  | -      | 1/3    |                     |
|                       | 28        | -                                  | -      | -      |                     |
|                       | 29        | -                                  | -      | 1/3    |                     |
|                       | 30        | -                                  | -      | -      |                     |
|                       | 31        | -                                  | -      | -      |                     |
|                       | 32        | -                                  | 3/3    |        | Stiff               |
|                       | 33        | 1/3                                | 3/3    |        | Black spots         |
|                       | 34        | -                                  | -      | -      |                     |
|                       | 35        | -                                  | 3/3    |        | Dark red            |
|                       | 36        | -                                  | 3/3    |        |                     |
|                       | 37        | -                                  | 3/3    |        |                     |
|                       | 38        | 1/3                                | 1/3    | 1/3    | Error               |
|                       | 39        | 1/3                                | 3/3    |        | Dark red            |
|                       | 40        | -                                  | 3/3    |        |                     |
|                       | 41        | 1/3                                | 3/3    |        | stiff               |
|                       | 42        | -                                  | 3/3    |        |                     |
|                       | 43        | -                                  | 3/3    |        |                     |
|                       | 44        | -                                  | 3/3    |        |                     |
|                       | 45        | 3/3                                |        |        | Black spots         |

Table S1. *Cont.*

| Series A<br>Batch no. | Plate no. | Mortality of Larvae (Time in Days) |        |        | Phenotype of Larvae |
|-----------------------|-----------|------------------------------------|--------|--------|---------------------|
|                       |           | 1 day                              | 2 days | 3 days |                     |
|                       | 1         | -                                  | 2/3    |        |                     |
|                       | 2         | -                                  | 2/3    |        |                     |
|                       | 3         | 2/3                                | 3/3    |        | Stiff               |
|                       | 4         | -                                  | 3/3    |        | Stiff               |
|                       | 5         | -                                  | 2/3    |        |                     |
|                       | 6         | -                                  | 3/3    |        | Stiff               |
|                       | 7         | -                                  | 2/3    |        | Reddish             |
|                       | 8         | -                                  | 3/3    |        | Stiff               |
|                       | 9         | -                                  | -      | -      | Black               |
|                       | 10        | -                                  | 3/3    |        | Stiff               |
|                       | 11        | -                                  | 2/3    | 3/3    | Stiff               |
|                       | 12        | -                                  | 1/3    | 1/3    | Dark red            |
|                       | 13        | -                                  | 1/3    | 2/3    |                     |
|                       | 14        | -                                  | 1/3    | 1/3    |                     |
|                       | 15        | -                                  | -      | -      |                     |
|                       | 16        | -                                  | 2/3    | 2/3    |                     |
|                       | 17        | -                                  | -      | -      |                     |
|                       | 18        | -                                  | -      | -      | Stiff               |
|                       | 19        | -                                  | 1/3    | 1/3    |                     |
| A9                    | 20        | -                                  | 1/3    | 1/3    |                     |
|                       | 21        | -                                  | -      | -      |                     |
|                       | 22        | -                                  | 2/3    | 2/3    | Dark red            |
|                       | 23        | -                                  | 2/3    | 2/3    |                     |
|                       | 24        | -                                  | -      | 1/3    | Black               |
|                       | 25        | -                                  | -      | 1/3    | Dark red            |
|                       | 26        | -                                  | 2/3    | 2/3    | Dark red            |
|                       | 27        | -                                  | 1/3    | 1/3    | Dark red            |
|                       | 28        | -                                  | 1/3    | 1/3    |                     |
|                       | 29        | 1/3                                | 2/3    | 3/3    | Stiff               |
|                       | 30        | -                                  | 1/3    | 3/3    | Dark red, Black     |
|                       | 31        | -                                  | 1/3    | 3/3    | Black               |
|                       | 32        | -                                  | 3/3    | 3/3    | Black               |
|                       | 33        | -                                  | 1/3    | 3/3    | Black               |
|                       | 34        | -                                  | -      | 3/3    | Black               |
|                       | 35        | -                                  | 3/3    | 3/3    | Dark red            |
|                       | 36        | -                                  | -      | 3/3    | Black               |
|                       | 37        | -                                  | 1/3    | 3/3    | Black               |
|                       | 38        | -                                  | -      | 1/3    | Black               |
|                       | 39        | 1/3                                | 1/3    | 2/3    | Black               |
|                       | 40        | 2/3                                | 2/3    | 3/3    | Black               |

Table S1. *Cont.*

| Series A<br>Batch no. | Plate no. | Mortality of Larvae (Time in Days) |        |        | Phenotype of Larvae |
|-----------------------|-----------|------------------------------------|--------|--------|---------------------|
|                       |           | 1 day                              | 2 days | 3 days |                     |
|                       | 1         | 1/3                                | 1/3    | 1/3    |                     |
|                       | 2         | 1/3                                | 2/3    | 2/3    |                     |
|                       | 3         | 1/3                                | 1/3    | 1/3    |                     |
|                       | 4         | 0/3                                | 0/3    | 0/3    |                     |
|                       | 5         | 0/3                                | 0/3    | 0/3    |                     |
|                       | 6         | 0/3                                | 0/3    | 1/3    |                     |
|                       | 7         | 0/3                                | 0/3    | 0/3    |                     |
|                       | 8         | 0/3                                | 0/3    | 1/3    |                     |
|                       | 9         | 0/3                                | 3/3    | 3/3    |                     |
|                       | 10        | 0/3                                | 3/3    | 3/3    |                     |
|                       | 11        | 0/3                                | 3/3    | 3/3    | stiff               |
|                       | 12        | 0/3                                | 3/3    | 3/3    |                     |
|                       | 13        | 0/3                                | 3/3    | 3/3    |                     |
|                       | 14        | 0/3                                | 3/3    | 3/3    | Stiff               |
|                       | 15        | 0/3                                | 3/3    | 3/3    | Stiff               |
|                       | 16        | 0/3                                | 3/3    | 3/3    | Error               |
|                       | 17        | 0/3                                | 3/3    | 3/3    |                     |
|                       | 18        | 0/3                                | 3/3    | 3/3    |                     |
|                       | 19        | 0/3                                | 3/3    | 3/3    |                     |
|                       | 20        | 0/3                                | 3/3    | 3/3    |                     |
|                       | 21        | 0/3                                | 3/3    | 3/3    |                     |
|                       | 22        | 0/3                                | 3/3    | 3/3    |                     |
|                       | 23        | 0/3                                | 3/3    | 3/3    |                     |
| A10                   | 24        | 0/3                                | 3/3    | 3/3    | Error               |
|                       | 25        | 0/3                                | 3/3    | 3/3    |                     |
|                       | 26        | 0/3                                | 3/3    | 3/3    |                     |
|                       | 27        | 0/3                                | 3/3    | 3/3    | Error               |
|                       | 28        | 0/3                                | 3/3    | 3/3    |                     |
|                       | 29        | 0/3                                | 0/3    | 0/3    |                     |
|                       | 30        | 0/3                                | 0/3    | 0/3    |                     |
|                       | 31        | 0/3                                | 0/3    | 0/3    |                     |
|                       | 32        | 0/3                                | 1/3    | 1/3    |                     |
|                       | 33        | 0/3                                | 0/3    | 0/3    |                     |
|                       | 34        | 0/3                                | 0/3    | 1/3    |                     |
|                       | 35        | 0/3                                | 1/3    | 1/3    |                     |
|                       | 36        | 0/3                                | 0/3    | 0/3    |                     |
|                       | 37        | 0/3                                | 1/3    | 1/3    | Stiff               |
|                       | 38        | 1/3                                | 1/3    | 1/3    | Stiff               |
|                       | 39        | 0/3                                | 0/3    | 0/3    |                     |
|                       | 40        | 0/3                                | 0/3    | 0/3    |                     |
|                       | 41        | 0/3                                | 0/3    | 0/3    |                     |
|                       | 42        | 0/3                                | 0/3    | 0/3    |                     |
|                       | 43        | 0/3                                | 0/3    | 0/3    |                     |
|                       | 44        | 1/3                                | 1/3    | 1/3    |                     |
|                       | 45        | 0/3                                | 0/3    | 0/3    |                     |
|                       | 46        | 0/3                                | 0/3    | 0/3    |                     |
|                       | 47        | 0/3                                | 0/3    | 0/3    |                     |

Table S1. *Cont.*

| Series B<br>Batch no. | Plate no. | Mortality of Larvae (Time in Days) |        |        | Phenotype of Larvae |
|-----------------------|-----------|------------------------------------|--------|--------|---------------------|
|                       |           | 1 day                              | 2 days | 3 days |                     |
| B1                    | 1         | 0/3                                | 0/3    | 0/3    |                     |
|                       | 2         | 0/3                                | 1/3    | 1/3    | Stiff               |
|                       | 3         | 0/3                                | 1/3    | 1/3    | Stiff               |
|                       | 4         | 0/3                                | 1/3    | 1/3    | Stiff               |
|                       | 5         | 0/3                                | 0/3    | 0/3    |                     |
|                       | 6         | 0/3                                | 0/3    | 0/3    |                     |
|                       | 7         | 0/3                                | 0/3    | 0/3    |                     |
|                       | 8         | 0/3                                | 0/3    | 0/3    |                     |
|                       | 9         | 0/3                                | 0/3    | 0/3    |                     |
|                       | 10        | 0/3                                | 0/3    | 0/3    |                     |
|                       | 11        | 0/3                                | 1/3    | 0/3    |                     |
|                       | 12        | 0/3                                | 0/3    | 0/3    |                     |
|                       | 13        | 0/3                                | 0/3    | 0/3    |                     |
|                       | 14        | 0/3                                | 0/3    | 0/3    |                     |
|                       | 15        | 0/3                                | 1/3    | 1/3    | Error               |
|                       | 16        | 0/3                                | 1/3    | 1/3    |                     |
|                       | 17        | 0/3                                | 1/3    | 1/3    |                     |
|                       | 18        | 0/3                                | 0/3    | 1/3    | Stiff               |
|                       | 19        | 0/3                                | 1/3    | 1/3    | Error               |
|                       | 20        | 0/3                                | 0/3    | 0/3    |                     |
| B2                    | 1         | 0/3                                | 0/3    | 0/3    |                     |
|                       | 2         | 0/3                                | 1/3    | 1/3    |                     |
|                       | 3         | 0/3                                | 1/3    | 1/3    | Error               |
|                       | 4         | 1/3                                | 1/3    | 1/3    | Stiff               |
|                       | 5         | 0/3                                | 0/3    | 0/3    |                     |
|                       | 6         | 1/3                                | 1/3    | 1/3    |                     |
|                       | 7         | 1/3                                | 2/3    | 2/3    |                     |
|                       | 8         | 1/3                                | 2/3    | 2/3    | Stiff               |
|                       | 9         | 1/3                                | 1/3    | 1/3    | Stiff               |
|                       | 10        | 0/3                                | 1/3    | 1/3    |                     |
|                       | 11        | 0/3                                | 0/3    | 0/3    |                     |
|                       | 12        | 0/3                                | 0/3    | 0/3    |                     |
|                       | 13        | 0/3                                | 0/3    | 0/3    |                     |
|                       | 14        | 0/3                                | 0/3    | 0/3    |                     |
|                       | 15        | 0/3                                | 0/3    | 0/3    |                     |
|                       | 16        | 0/3                                | 0/3    | 0/3    |                     |
|                       | 17        | 1/3                                | 2/3    | 2/3    |                     |
|                       | 18        | 1/3                                | 2/3    | 2/3    |                     |
|                       | 19        | 0/3                                | 0/3    | 0/3    |                     |
|                       | 20        | 0/3                                | 1/3    | 1/3    |                     |
|                       | 21        | 1/3                                | 2/3    | 2/3    |                     |
|                       | 22        | 0/3                                | 0/3    | 1/3    |                     |
|                       | 23        | 0/3                                | 0/3    | 0/3    |                     |
|                       | 24        | 1/3                                | 1/3    | 1/3    |                     |
|                       | 25        | 1/3                                | 1/3    | 2/3    |                     |

Table S1. *Cont.*

| Series B<br>Batch no. | Plate no. | Mortality of Larvae (Time in Days) |        |        | Phenotype of Larvae |
|-----------------------|-----------|------------------------------------|--------|--------|---------------------|
|                       |           | 1 day                              | 2 days | 3 days |                     |
| B2                    | 26        | 0/3                                | 0/3    | 1/3    |                     |
|                       | 27        | 0/3                                | 0/3    | 0/3    |                     |
|                       | 28        | 1/3                                | 1/3    | 1/3    |                     |
|                       | 29        | 0/3                                | 0/3    | 0/3    |                     |
|                       | 30        | 0/3                                | 1/3    | 1/3    |                     |
|                       | 31        | 0/3                                | 1/3    | 1/3    |                     |
|                       | 32        | 1/3                                | 1/3    | 1/3    |                     |
|                       | 33        | 0/3                                | 0/3    | 0/3    |                     |
|                       | 34        | 0/3                                | 0/3    | 0/3    |                     |
|                       | 35        | 1/3                                | 1/3    | 1/3    | Stiff               |
|                       | 36        | 1/3                                | 1/3    | 1/3    | Black               |
|                       | 37        | 0/3                                | 0/3    | 0/3    |                     |
|                       | 38        | 0/3                                | 0/3    | 0/3    |                     |
|                       | 39        | 0/3                                | 0/3    | 0/3    |                     |
|                       | 40        | 0/3                                | 0/3    | 0/3    |                     |
|                       | 41        | 0/3                                | 0/3    | 0/3    |                     |
|                       | 42        | 0/3                                | 0/3    | 0/3    |                     |
|                       | 43        | 0/3                                | 0/3    | 0/3    |                     |
|                       | 44        | 0/3                                | 0/3    | 0/3    |                     |
|                       | 45        | 0/3                                | 0/3    | 0/3    |                     |
| 46                    | 0/3       | 0/3                                | 0/3    |        |                     |
| 47                    | 0/3       | 0/3                                | 0/3    |        |                     |

\* Death/Total.

Table 2. Second round of PtC screening to detect the insecticidal activity.

| Series A<br>Batch no. | Plate no. | Mortality of Larvae (Time in Days) |        |        | Phenotype of Larvae |
|-----------------------|-----------|------------------------------------|--------|--------|---------------------|
|                       |           | 1 day                              | 2 days | 3 days |                     |
| A5                    | 10        | -                                  | -      | 4/4    | Black               |
|                       | 11        | 1/4                                | 1/4    | 2/4    | error               |
|                       | 13        | -                                  | -      | 2/4    |                     |
|                       | 18        | -                                  | 1/4    | 1/4    |                     |
|                       | 24        | 1/4                                | 1/4    | 4/4    | Black               |
|                       | 28        | -                                  | -      | 3/4    | Black               |
|                       | 29        | 1/4                                | 2/4    | 3/4    |                     |
|                       | 11        | -                                  | 2/4    | 4/4    | Gray                |
| A6                    | 13        | 1/4                                | 1/4    | 4/4    | Error               |
|                       | 20        | 1/4                                | 1/4    | 2/4    |                     |
|                       | 21        |                                    | 4/4    |        | Black               |
|                       | 28        | -                                  | 1/4    | 2/4    | Black               |
|                       | 29        | 1/4                                | 1/4    | 2/4    | Black               |
|                       | 39        | -                                  | 1/4    | 3/4    | Dark red            |
|                       | 45        | -                                  | 2/4    | 4/4    | Dark red            |
|                       | 48        | -                                  | -      | 3/4    | Black               |

Table S2. *Cont.*

| Series A<br>Batch no. | Plate no. | Mortality of Larvae (Time in Days) |        |        | Phenotype of Larvae |
|-----------------------|-----------|------------------------------------|--------|--------|---------------------|
|                       |           | 1 day                              | 2 days | 3 days |                     |
| A7                    | 3         | 3/3                                | 3/3    | 3/3    | Brown               |
|                       | 5         | 2/3                                | 2/3    | 3/3    | Error               |
|                       | 11        | -                                  | -      | -      | Dark red            |
|                       | 15        | -                                  | -      | -      |                     |
|                       | 16        | -                                  | -      | -      | Dark red            |
|                       | 18        | -                                  | -      | -      | Black               |
|                       | 19        | -                                  | -      | -      | Black               |
|                       | 22        | 2/3                                | 2/3    | 2/3    | Black               |
|                       | 26        | -                                  | -      | -      | Black               |
|                       | 27        | 1/3                                | 1/3    | 1/3    | Dark red            |
|                       | 38        | -                                  | -      | -      | Black               |
|                       | 39        | -                                  | -      | 1/3    |                     |
| A9                    | 2         | -                                  | 3/3    | -      | Dark red            |
|                       | 5         | -                                  | -      | -      |                     |
|                       | 8         | 1/3                                | 1/3    | 1/3    |                     |
|                       | 16        | -                                  | -      | -      |                     |
|                       | 19        | -                                  | -      | -      |                     |
|                       | 20        | -                                  | 2/3    | 3/3    | Error               |
|                       | 21        | -                                  | -      | -      |                     |
|                       | 30        | -                                  | -      | -      |                     |
|                       | 37        | -                                  | -      | -      |                     |
|                       | 41        | 1/3                                | 2/3    | 2/3    |                     |
| A10                   | 30        | -                                  | 1/3    | 3/3    | Dark red            |
|                       | 31        | -                                  | 1/3    | 3/3    | Black               |
|                       | 32        | -                                  | 3/3    | 3/3    | Black               |
|                       | 33        | -                                  | 1/3    | 3/3    | Black               |
|                       | 34        | -                                  | -      | 3/3    | Black               |
|                       | 35        | -                                  | 3/3    | 3/3    | Dark red            |
|                       | 36        | -                                  | -      | 3/3    | Black               |
|                       | 37        | -                                  | 1/3    | 3/3    | Black               |
|                       | 38        | -                                  | -      | 1/3    | Black               |
|                       | 39        | 1/3                                | 1/3    | 2/3    | Black               |
|                       | 40        | 2/3                                | 2/3    | 3/3    | Black               |



Table S2. Cont.

| Series B<br>Batch no. | Plate no. | Mortality of Larvae (Time in Days) |       |       | Phenotype of Larvae |
|-----------------------|-----------|------------------------------------|-------|-------|---------------------|
|                       |           | 1 day                              | 2 day | 3 day |                     |
| B1                    | 2         | 1/3                                | 1/3   | 1/3   |                     |
|                       | 3         | 1/3                                | 2/3   | 2/3   |                     |
|                       | 5         | 1/3                                | 1/3   | 1/3   |                     |
|                       | 7         | -                                  | -     | -     |                     |
|                       | 8         | -                                  | -     | -     |                     |
|                       | 10        | -                                  | -     | 1/3   |                     |
|                       | 12        | -                                  | -     | -     |                     |
|                       | 15        | -                                  | -     | 1/3   |                     |
|                       | 20        | -                                  | 3/3   | 3/3   |                     |
|                       | 21        | -                                  | 3/3   | 3/3   |                     |
|                       | 26        | -                                  | 3/3   | 3/3   | Stiff               |
|                       | 29        | -                                  | 3/3   | 3/3   |                     |
|                       | 36        | -                                  | 3/3   | 3/3   |                     |
|                       | 38        | -                                  | -     | 1/3   |                     |
| 40                    | -         | 1/3                                | 1/3   |       |                     |
| 41                    | -         | -                                  | -     |       |                     |
| B2                    | 1         | -                                  | -     | 2/3   |                     |
|                       | 2         | -                                  | -     | -     |                     |
|                       | 3         | -                                  | -     | 1/3   | Black               |
|                       | 9         | 1/3                                | 1/3   | 2/3   | Dark red            |
|                       | 10        | -                                  | -     | -     |                     |
|                       | 29        | 2/3                                | 3/3   |       | Black               |
|                       | 30        | 2/3                                | 3/3   | 3/3   | Dark red            |
|                       | 32        | 1/3                                | 1/3   | 1/3   |                     |
|                       | 35        | -                                  | -     | -     |                     |
|                       | 38        | -                                  | -     | -     |                     |
| 42                    | -         | -                                  | -     | Black |                     |

Note: The dash (-) mark represents that the injection cause no mortality in the larvae.

**Figure S1.** The putative toxin gene sequence from the *Photorhabdus temperata* M1021 was aligned against the *mcf* gene of *Photorhabdus luminescens* TT01 using a CLC genomics work bench version 7.0 alignment tool. The alignment revealed 85% of the sequence similarity and 98% of the query coverage, indicating that the gene isolated and sequenced from *P. temperata* M1021 was the *mcf* gene, encoding “makes caterpillars floppy” (Mcf) toxin.

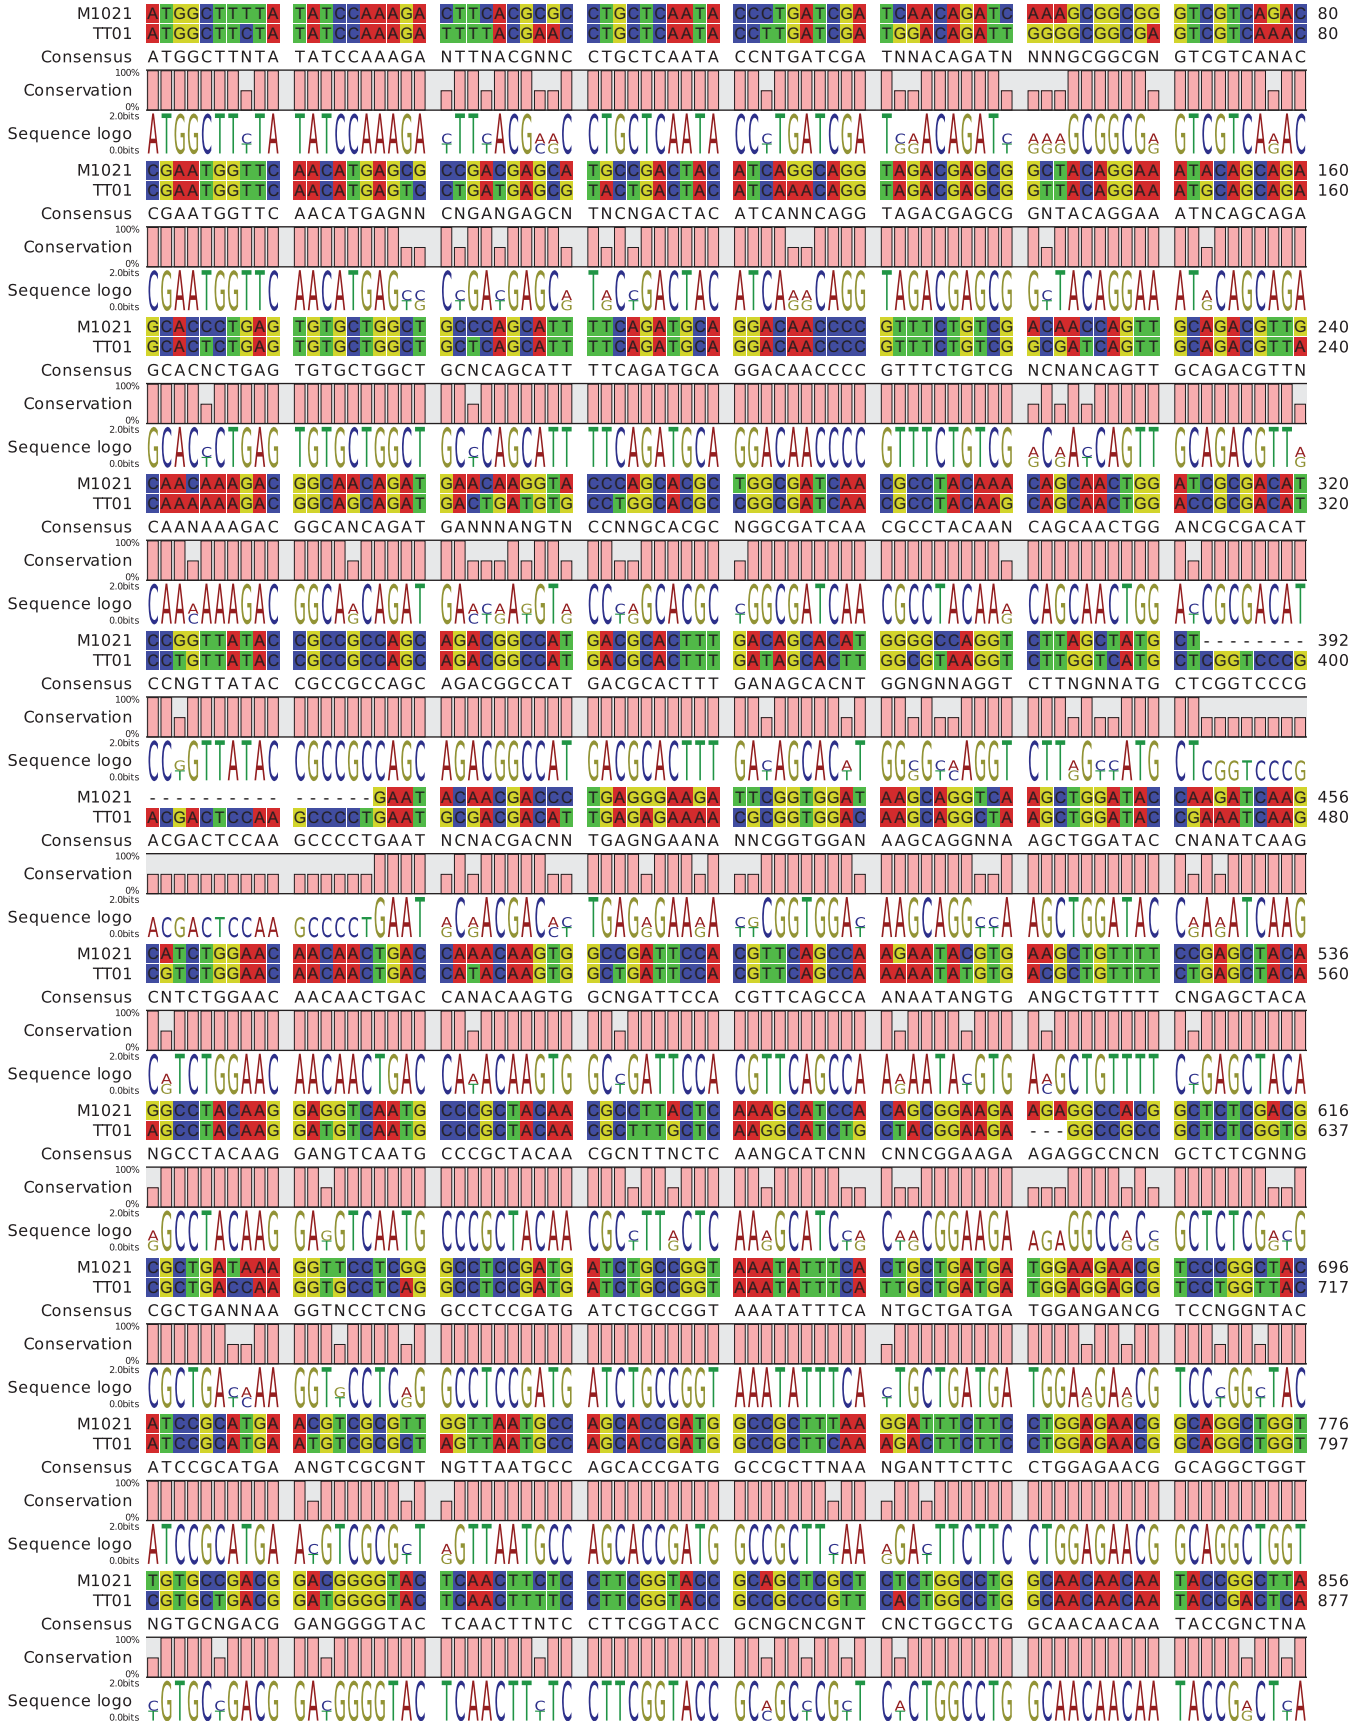

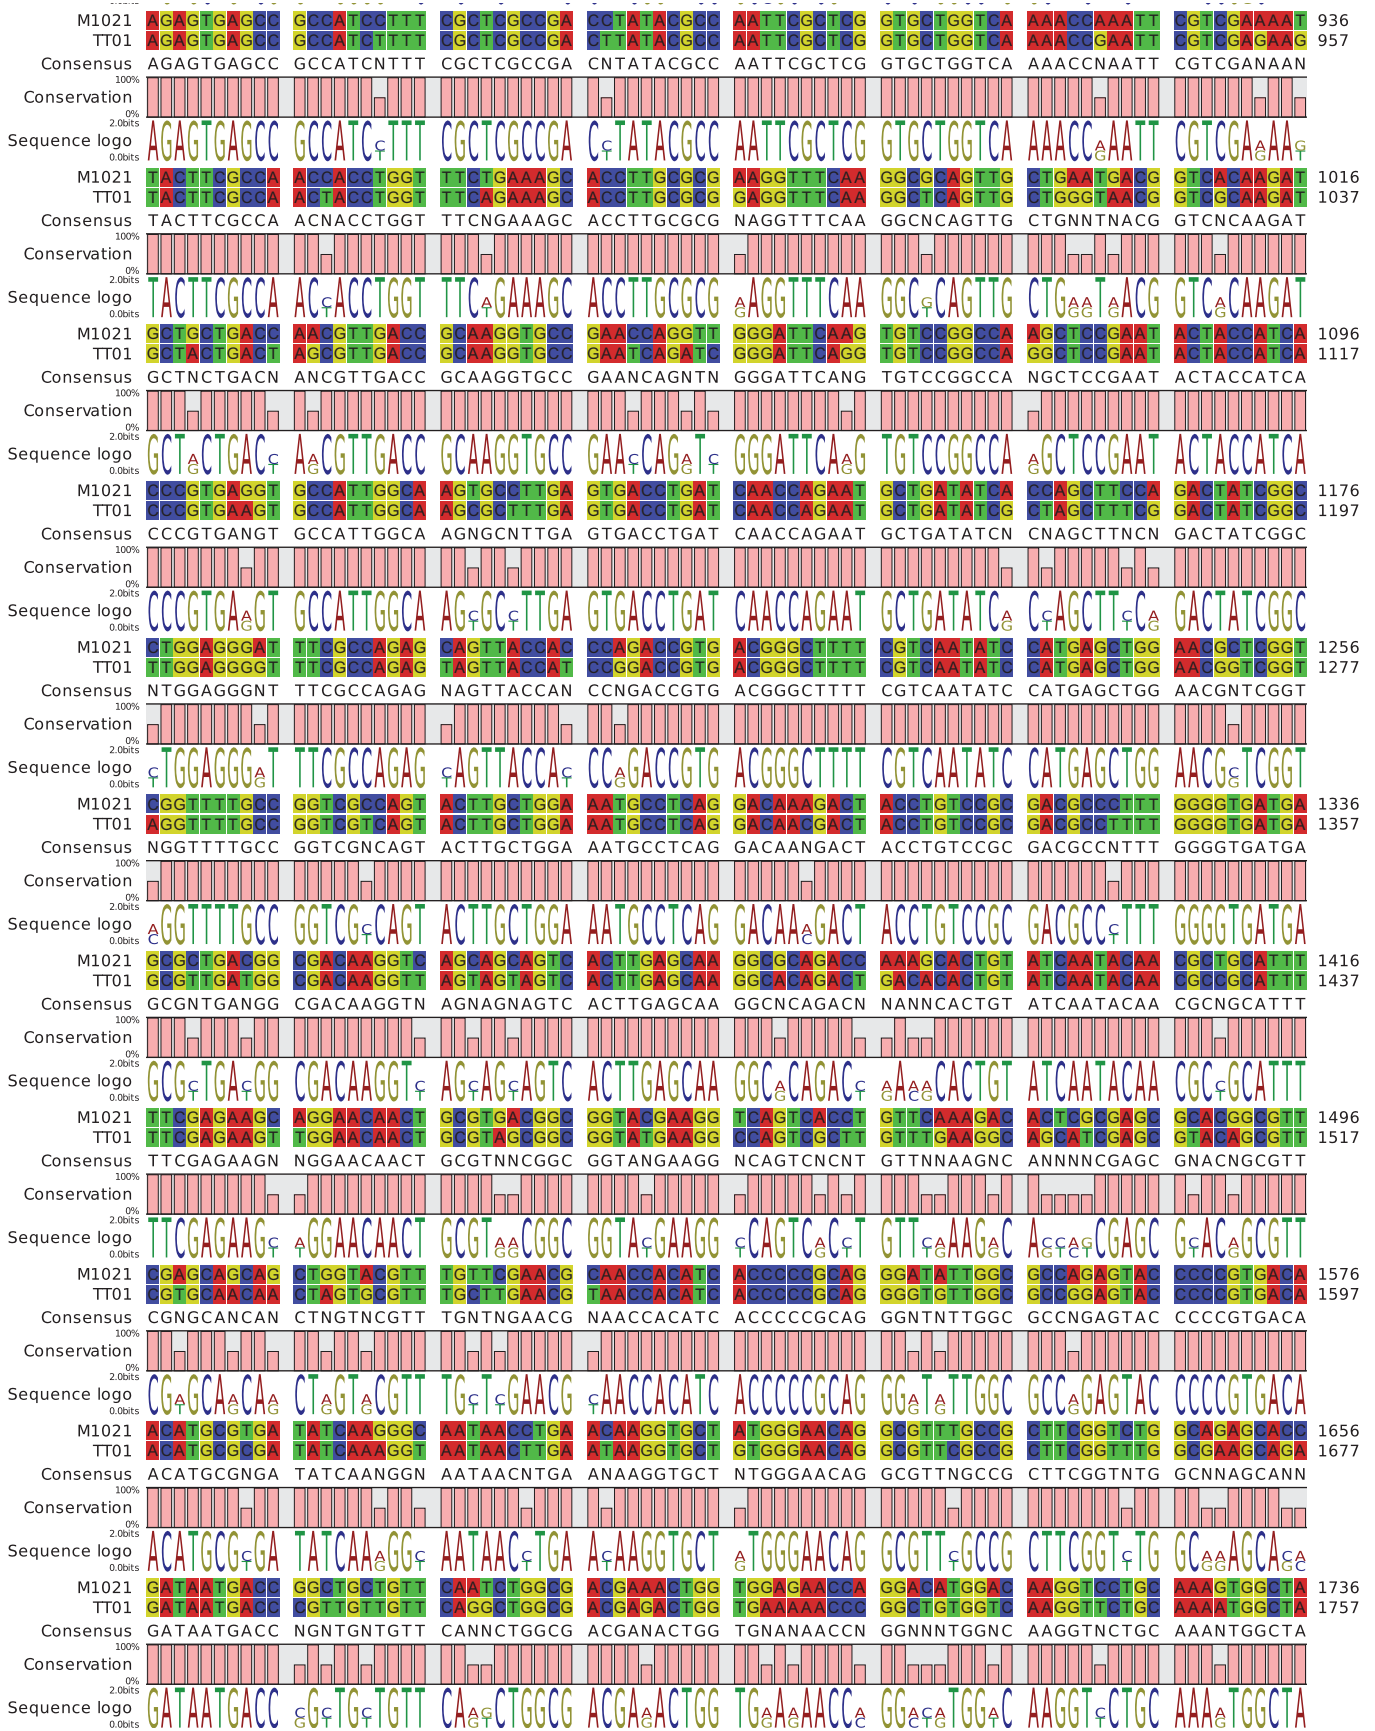

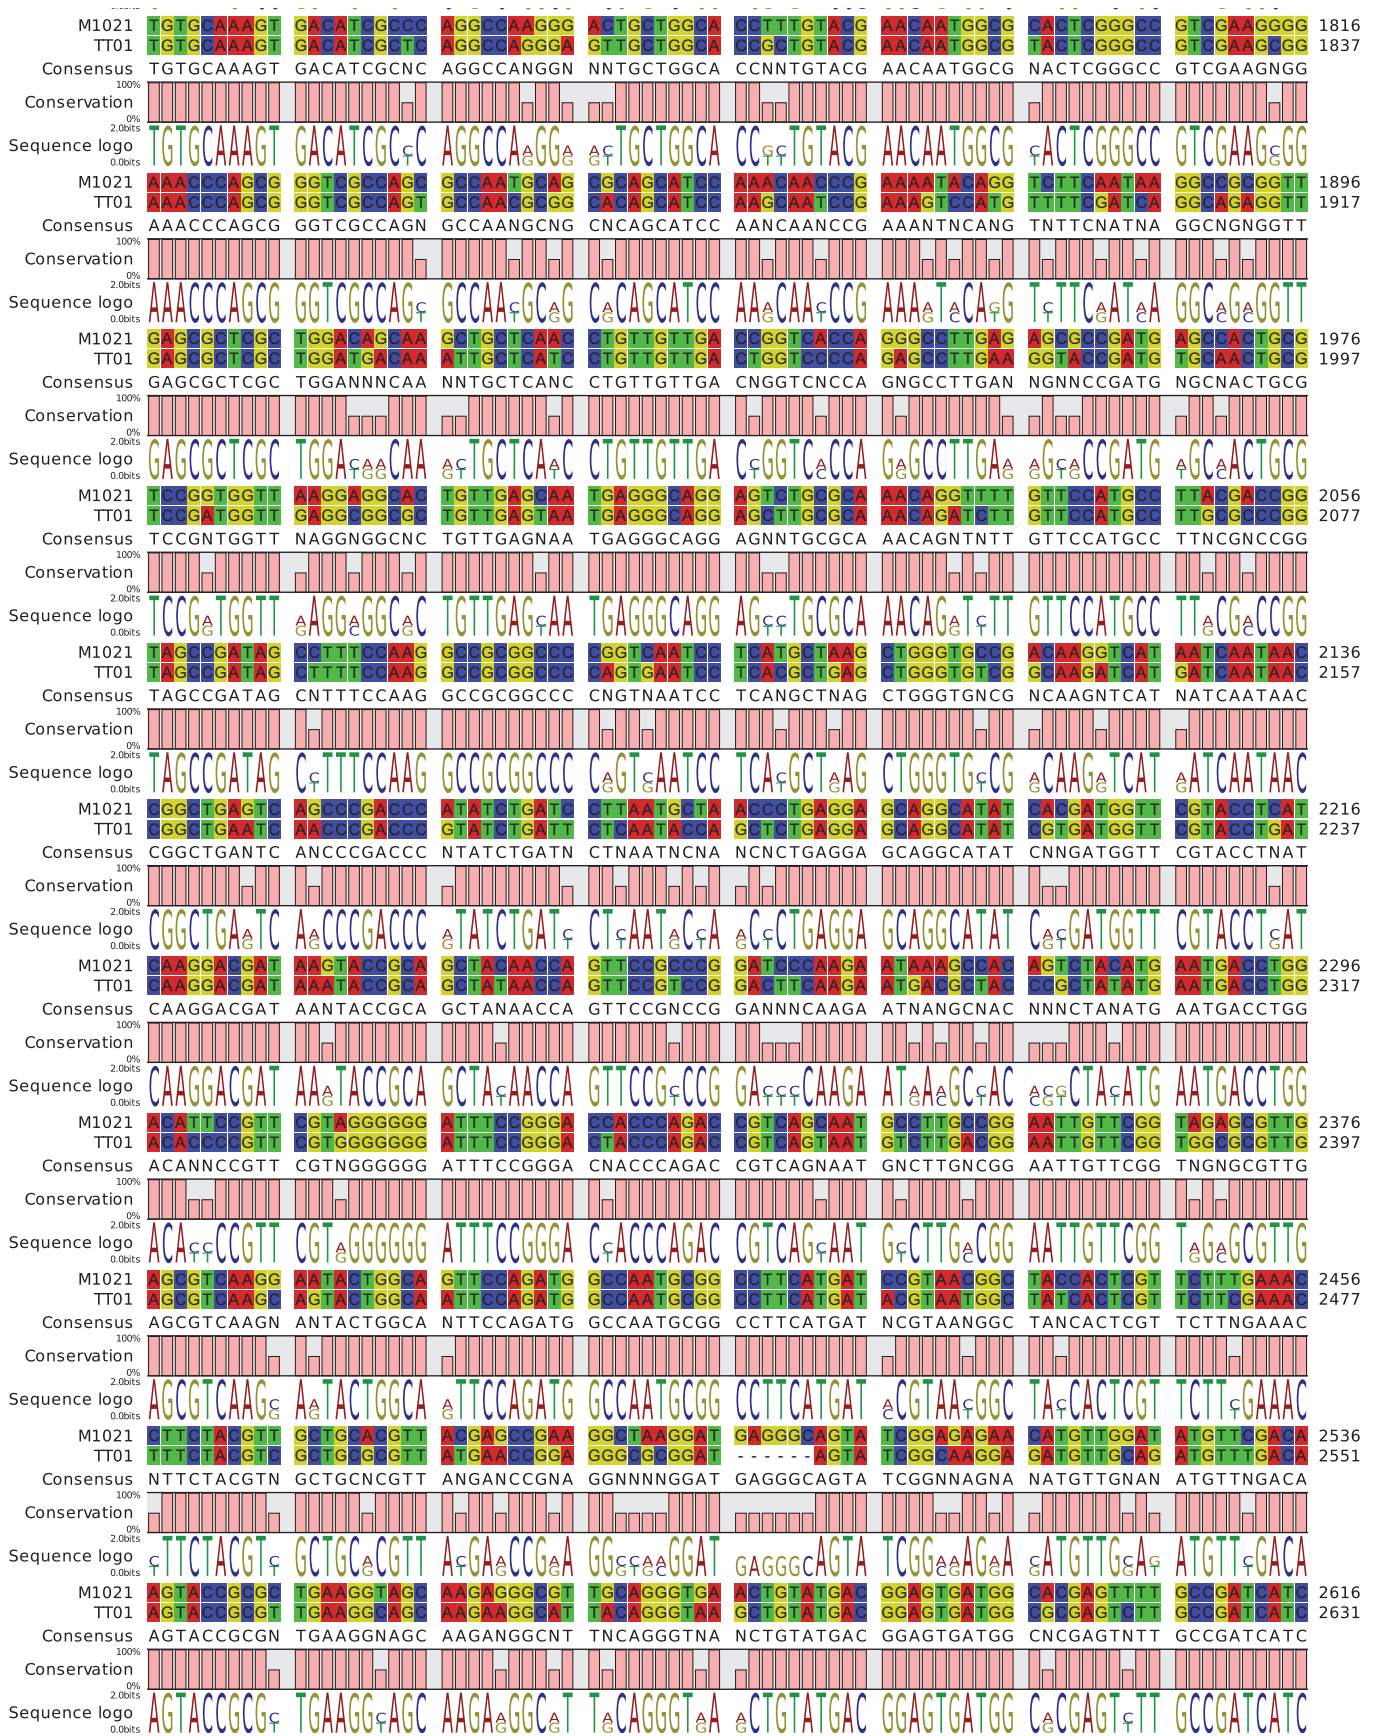

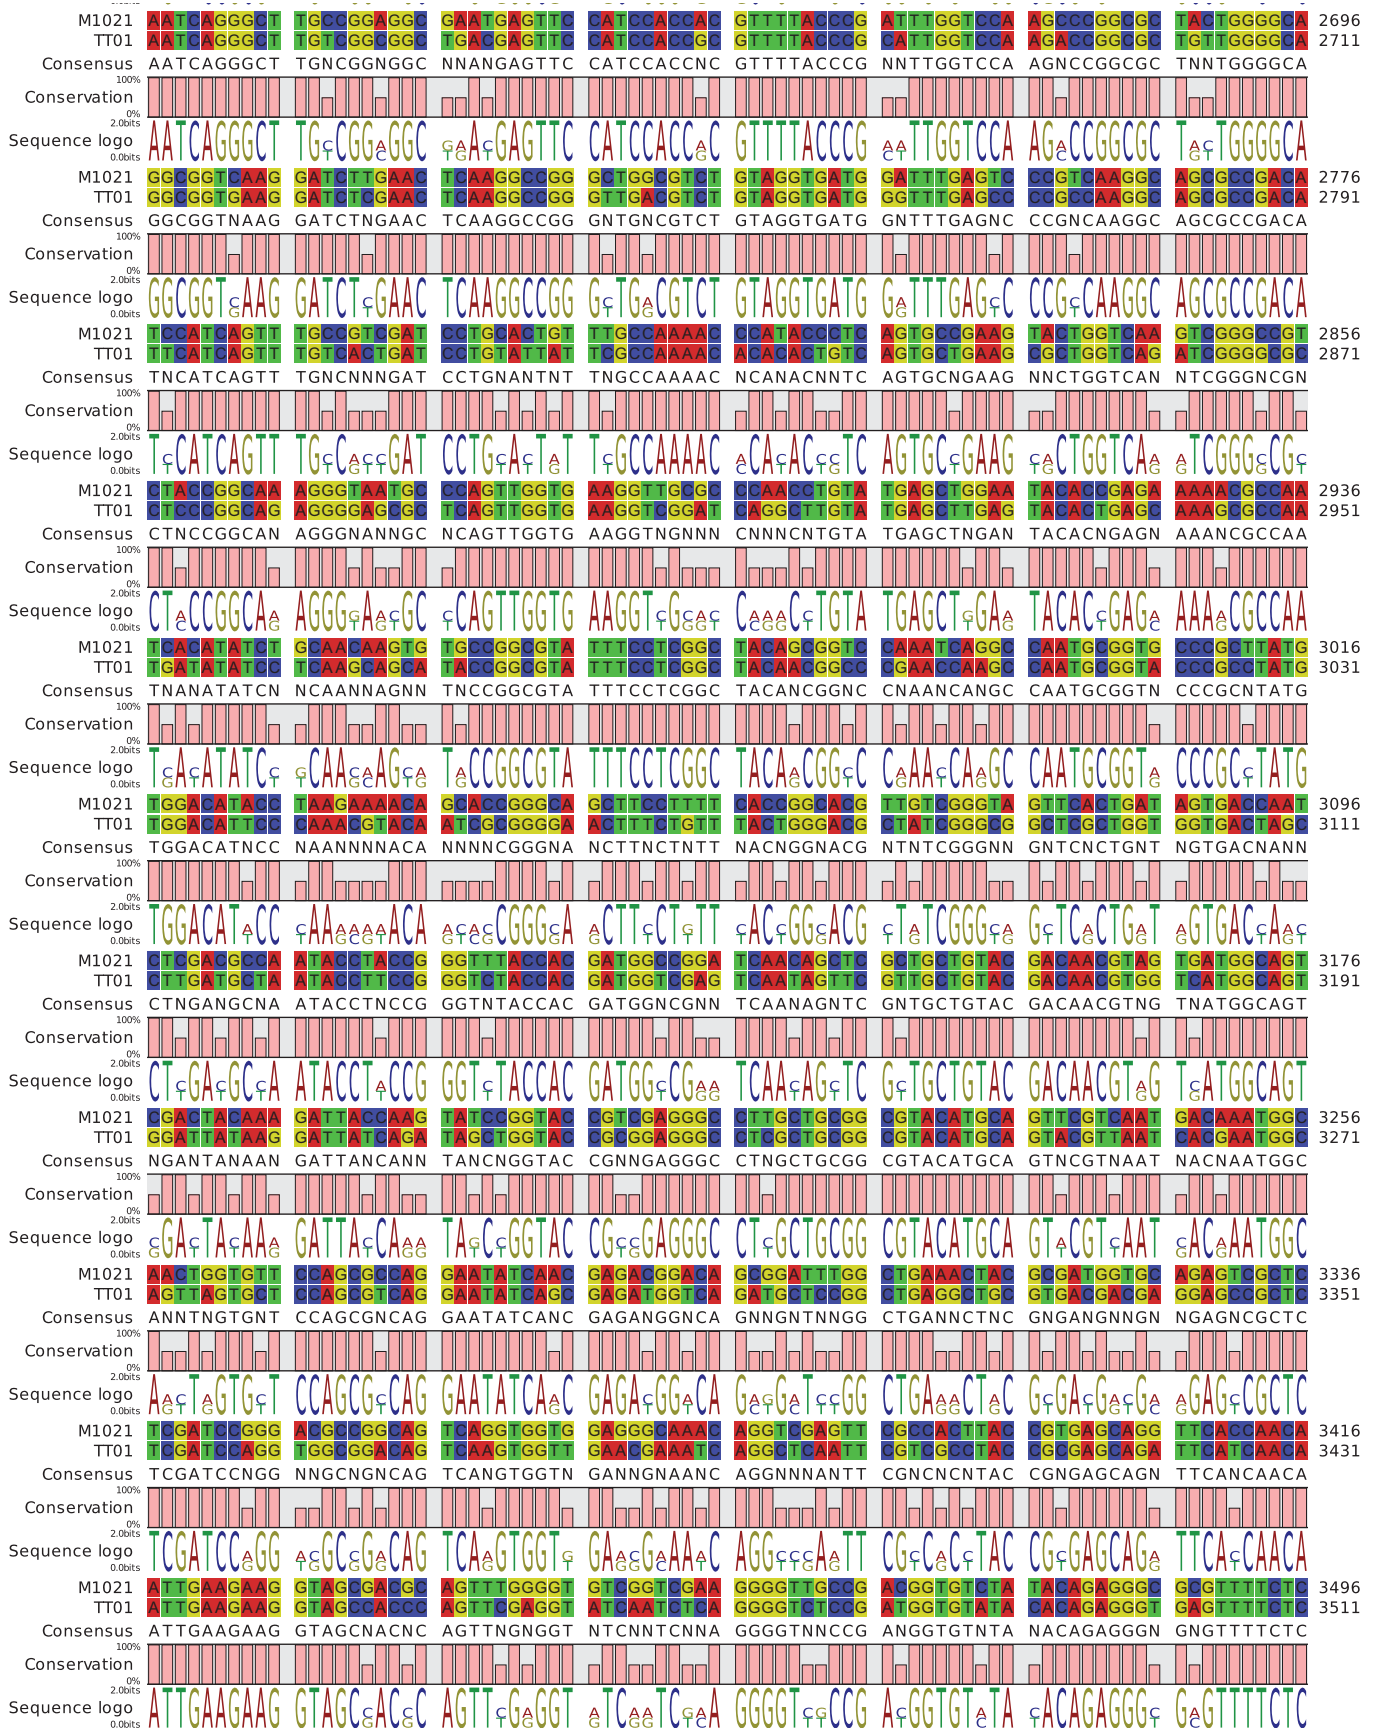

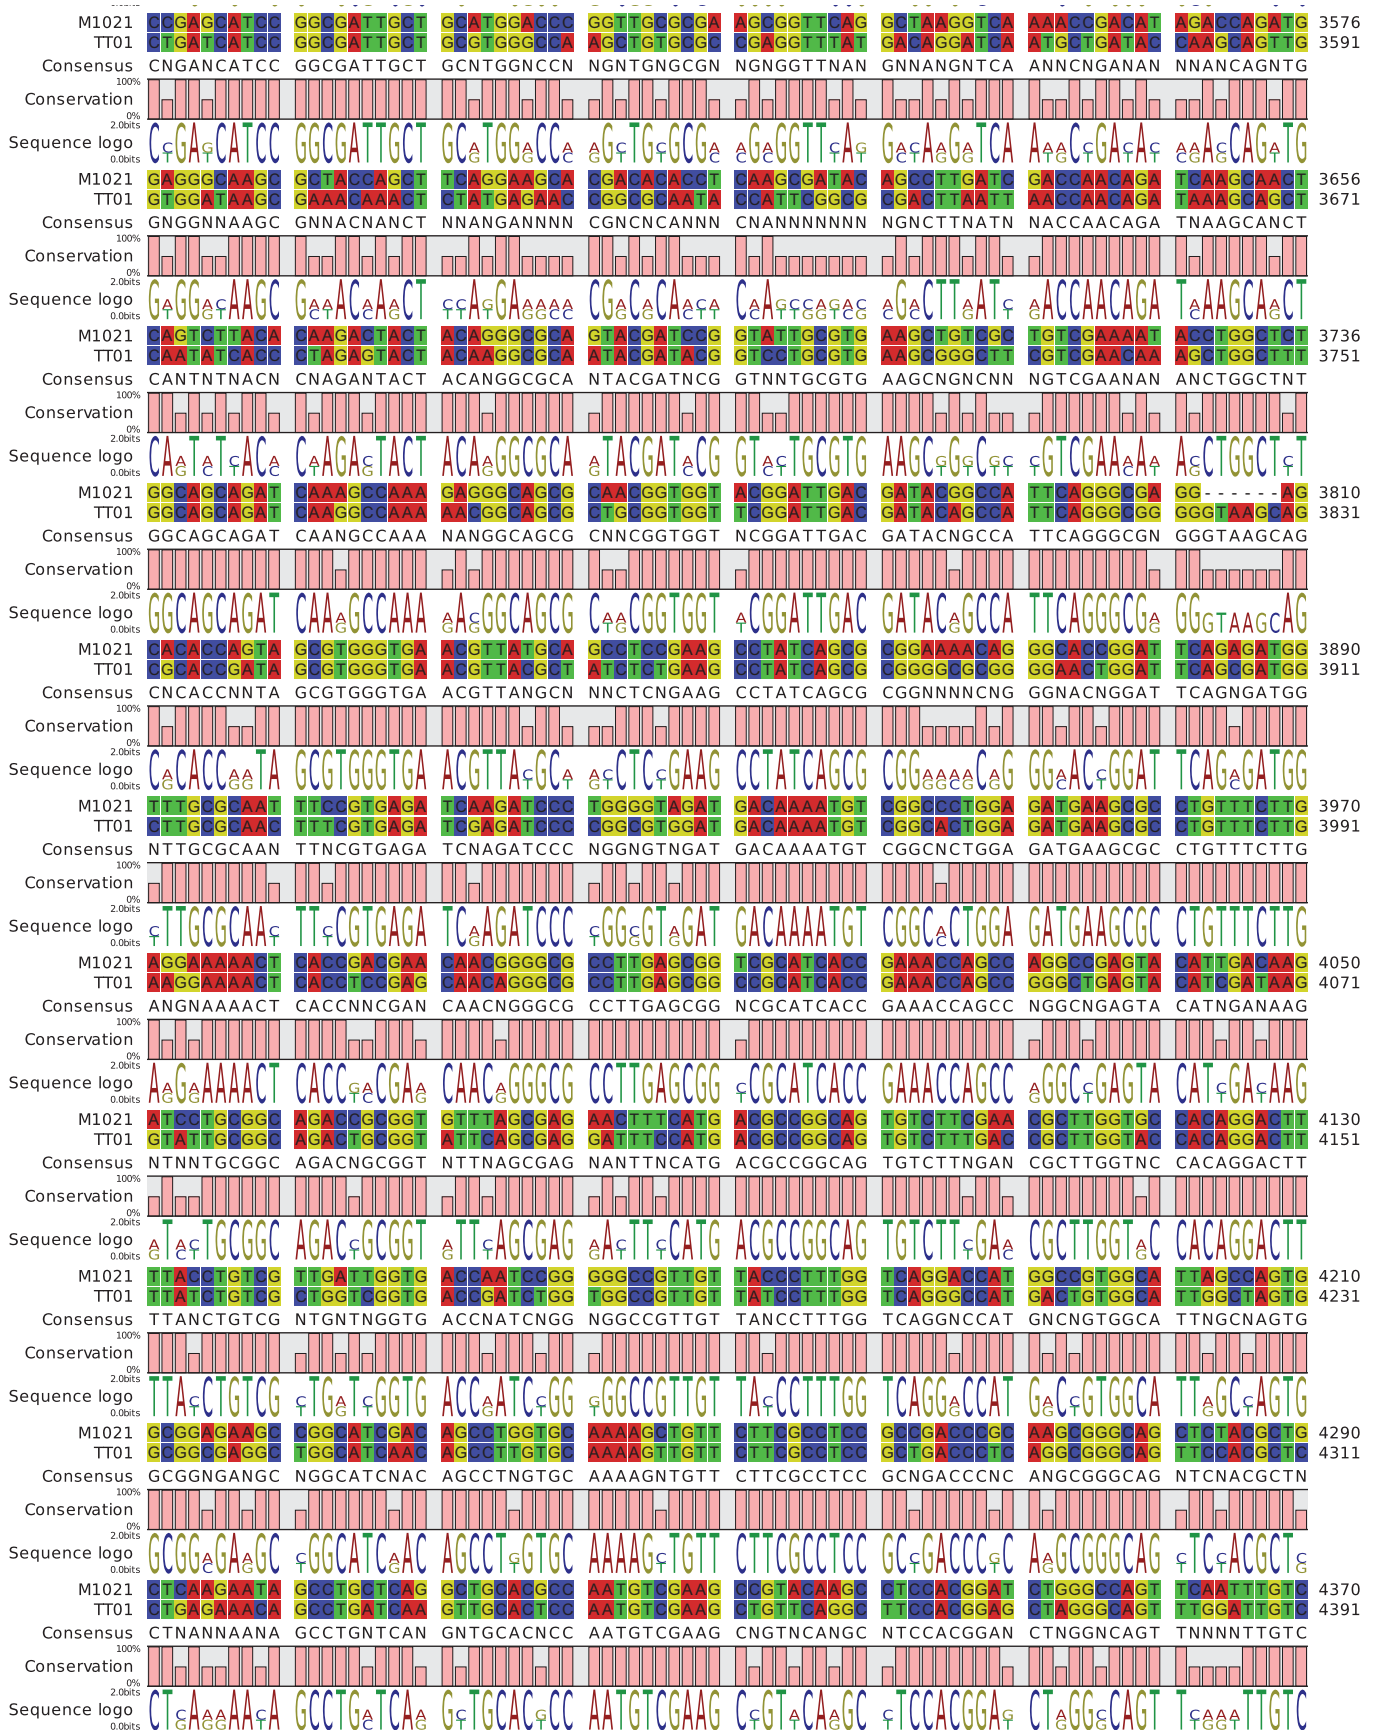

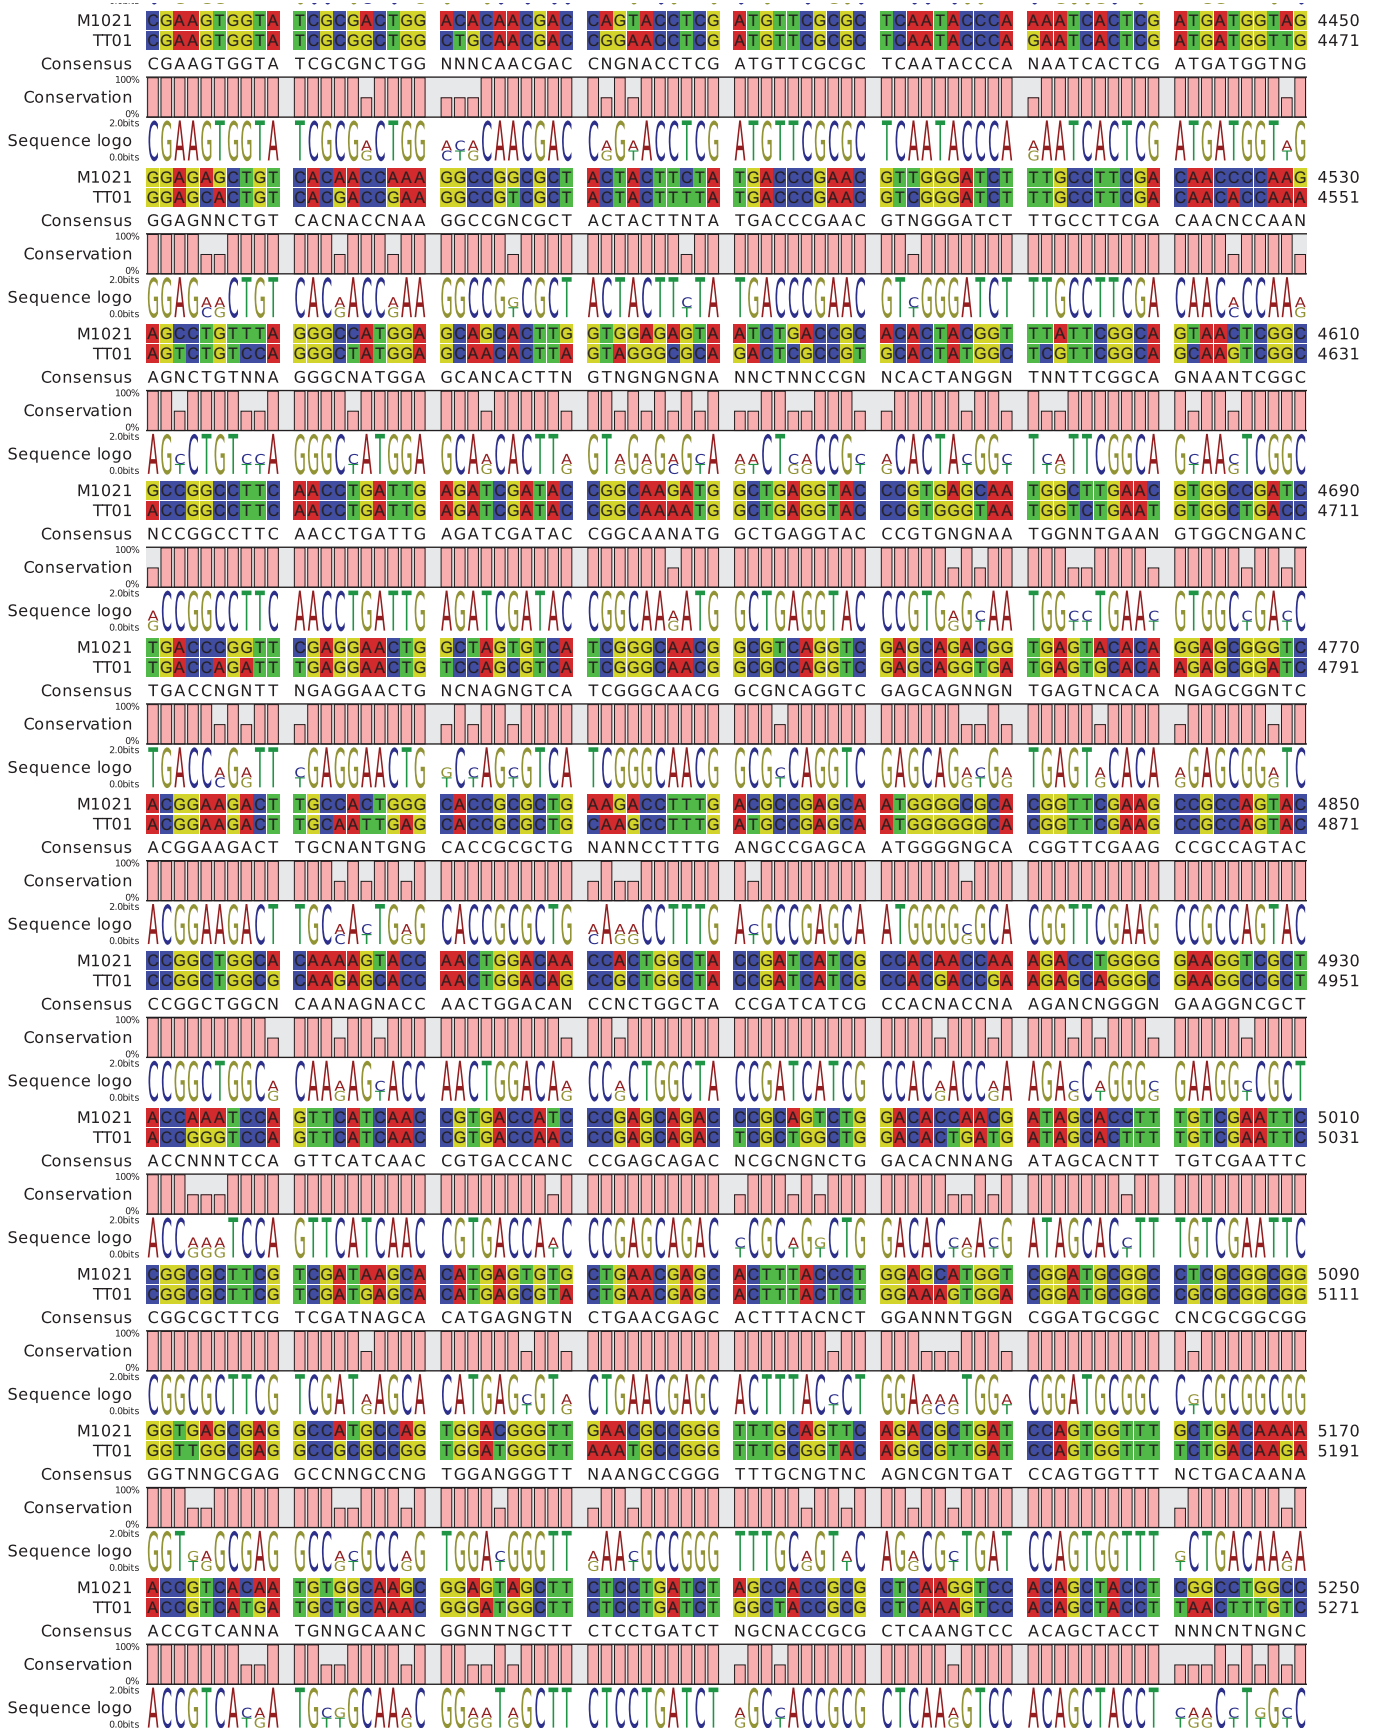

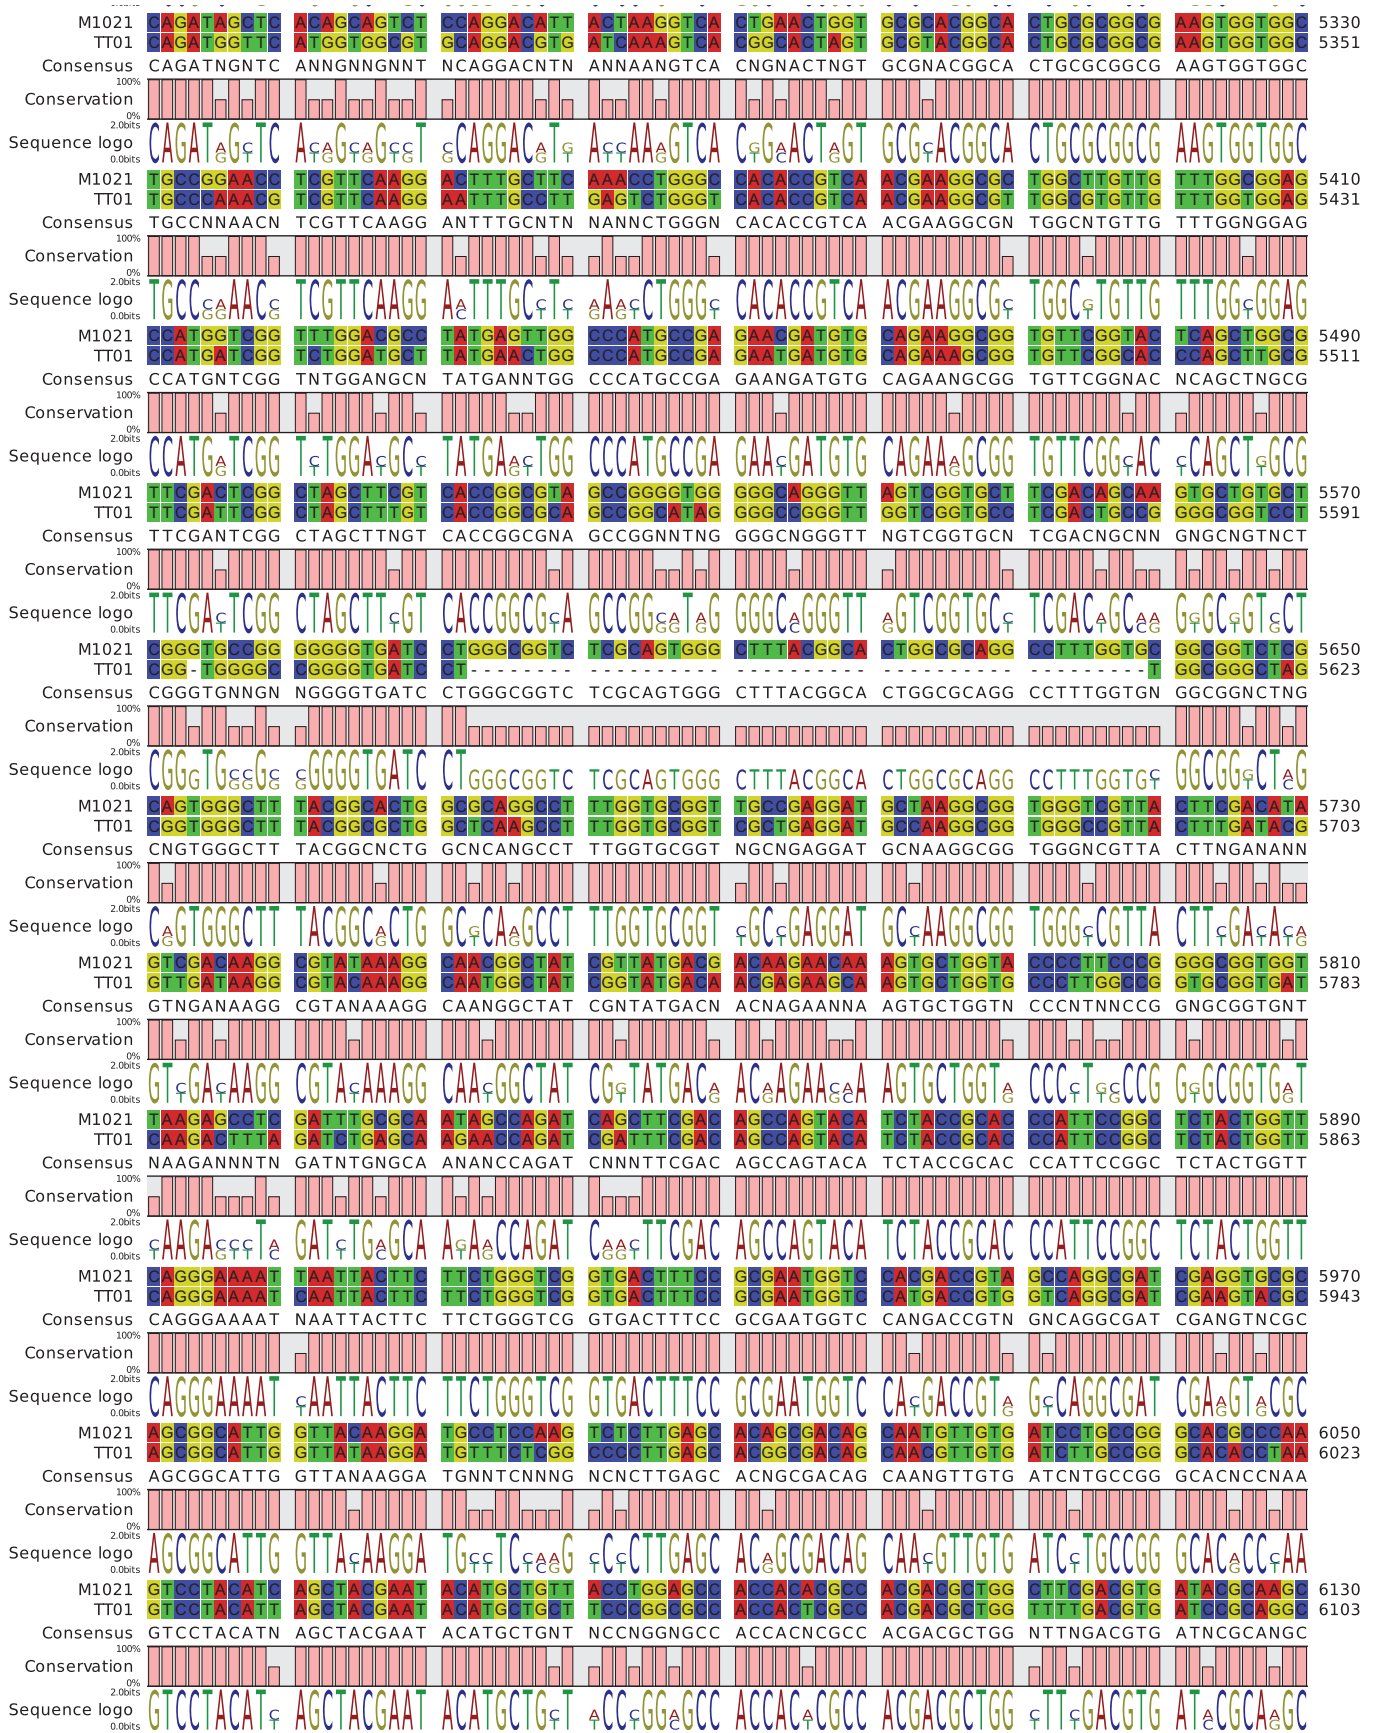



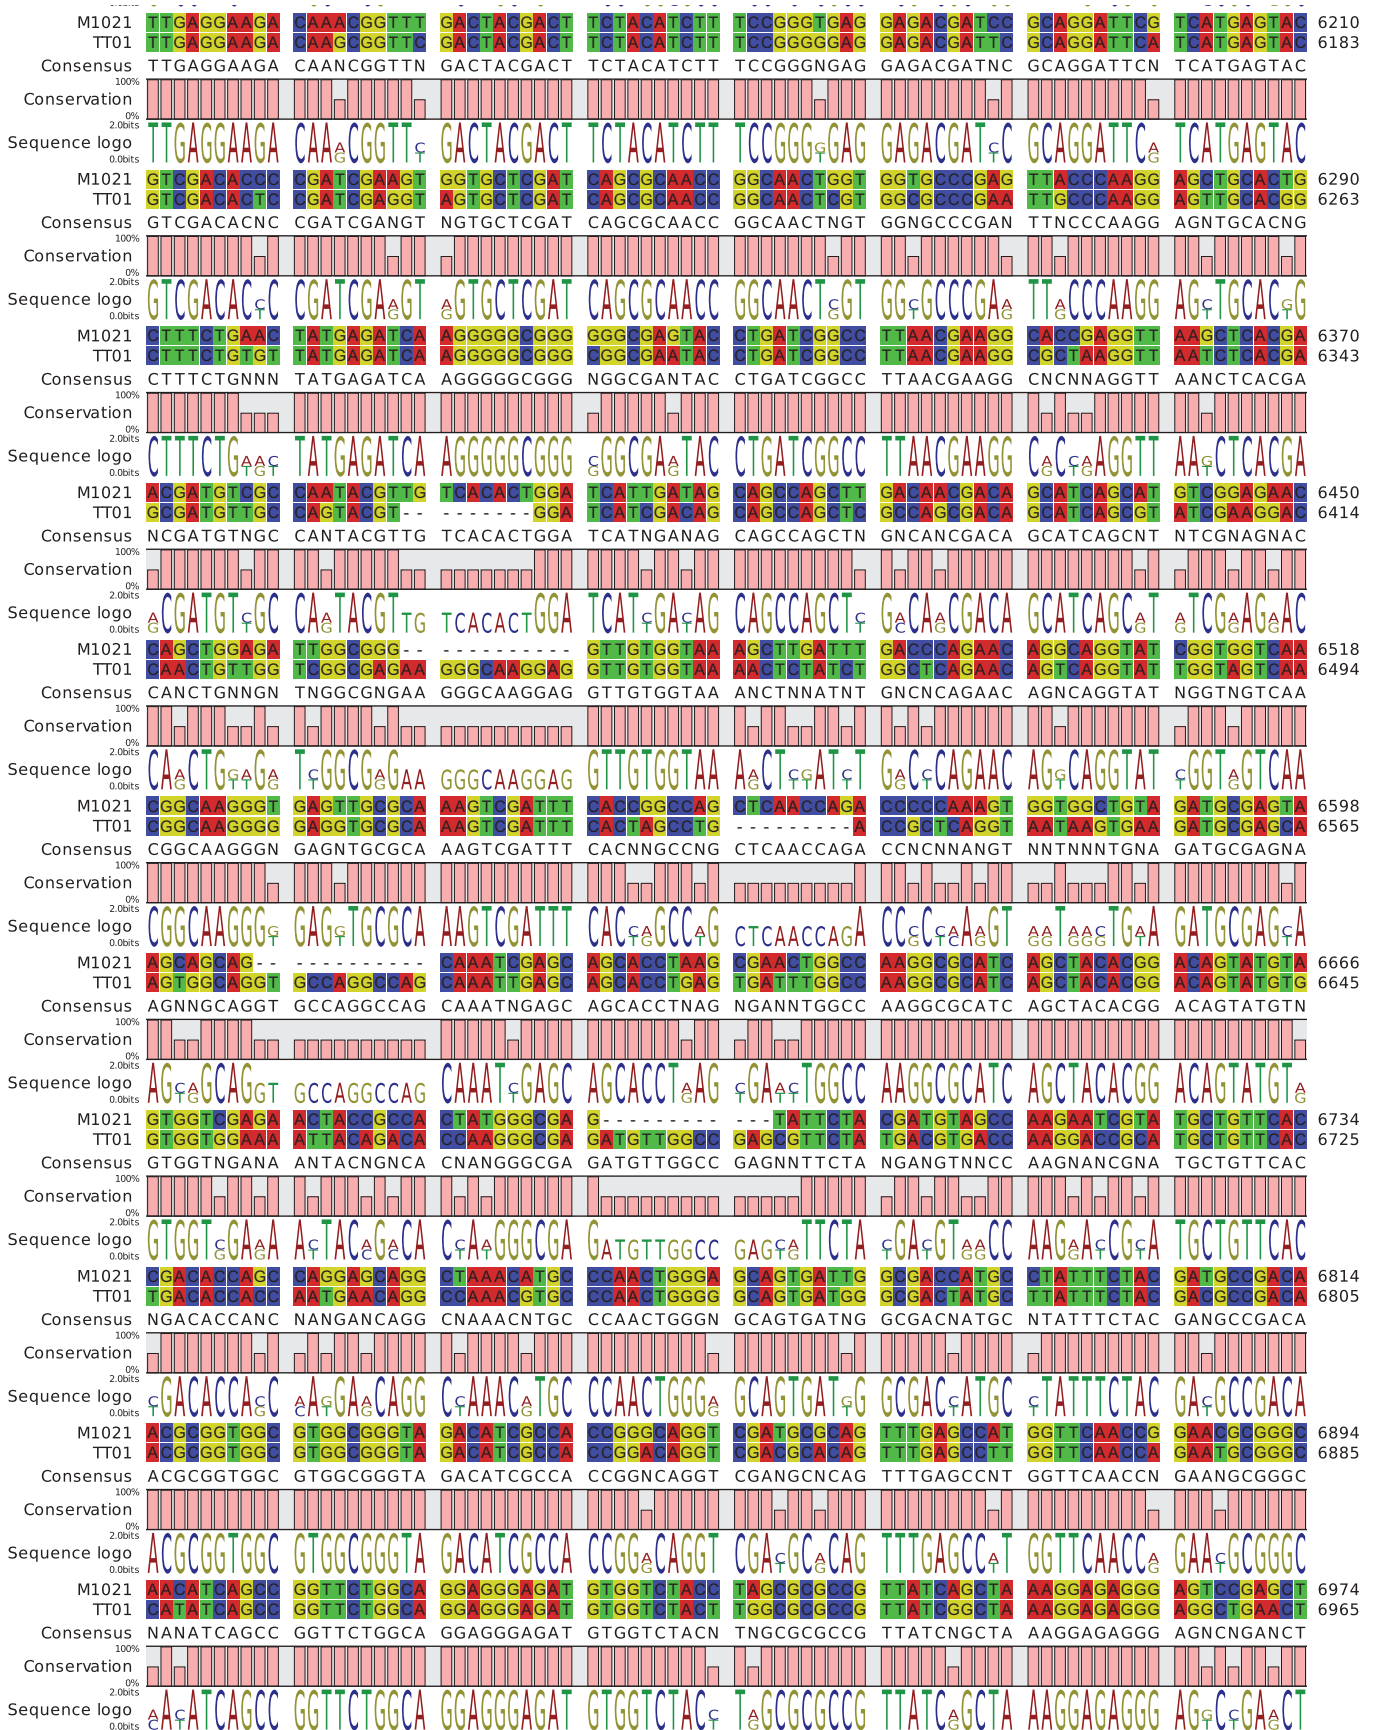

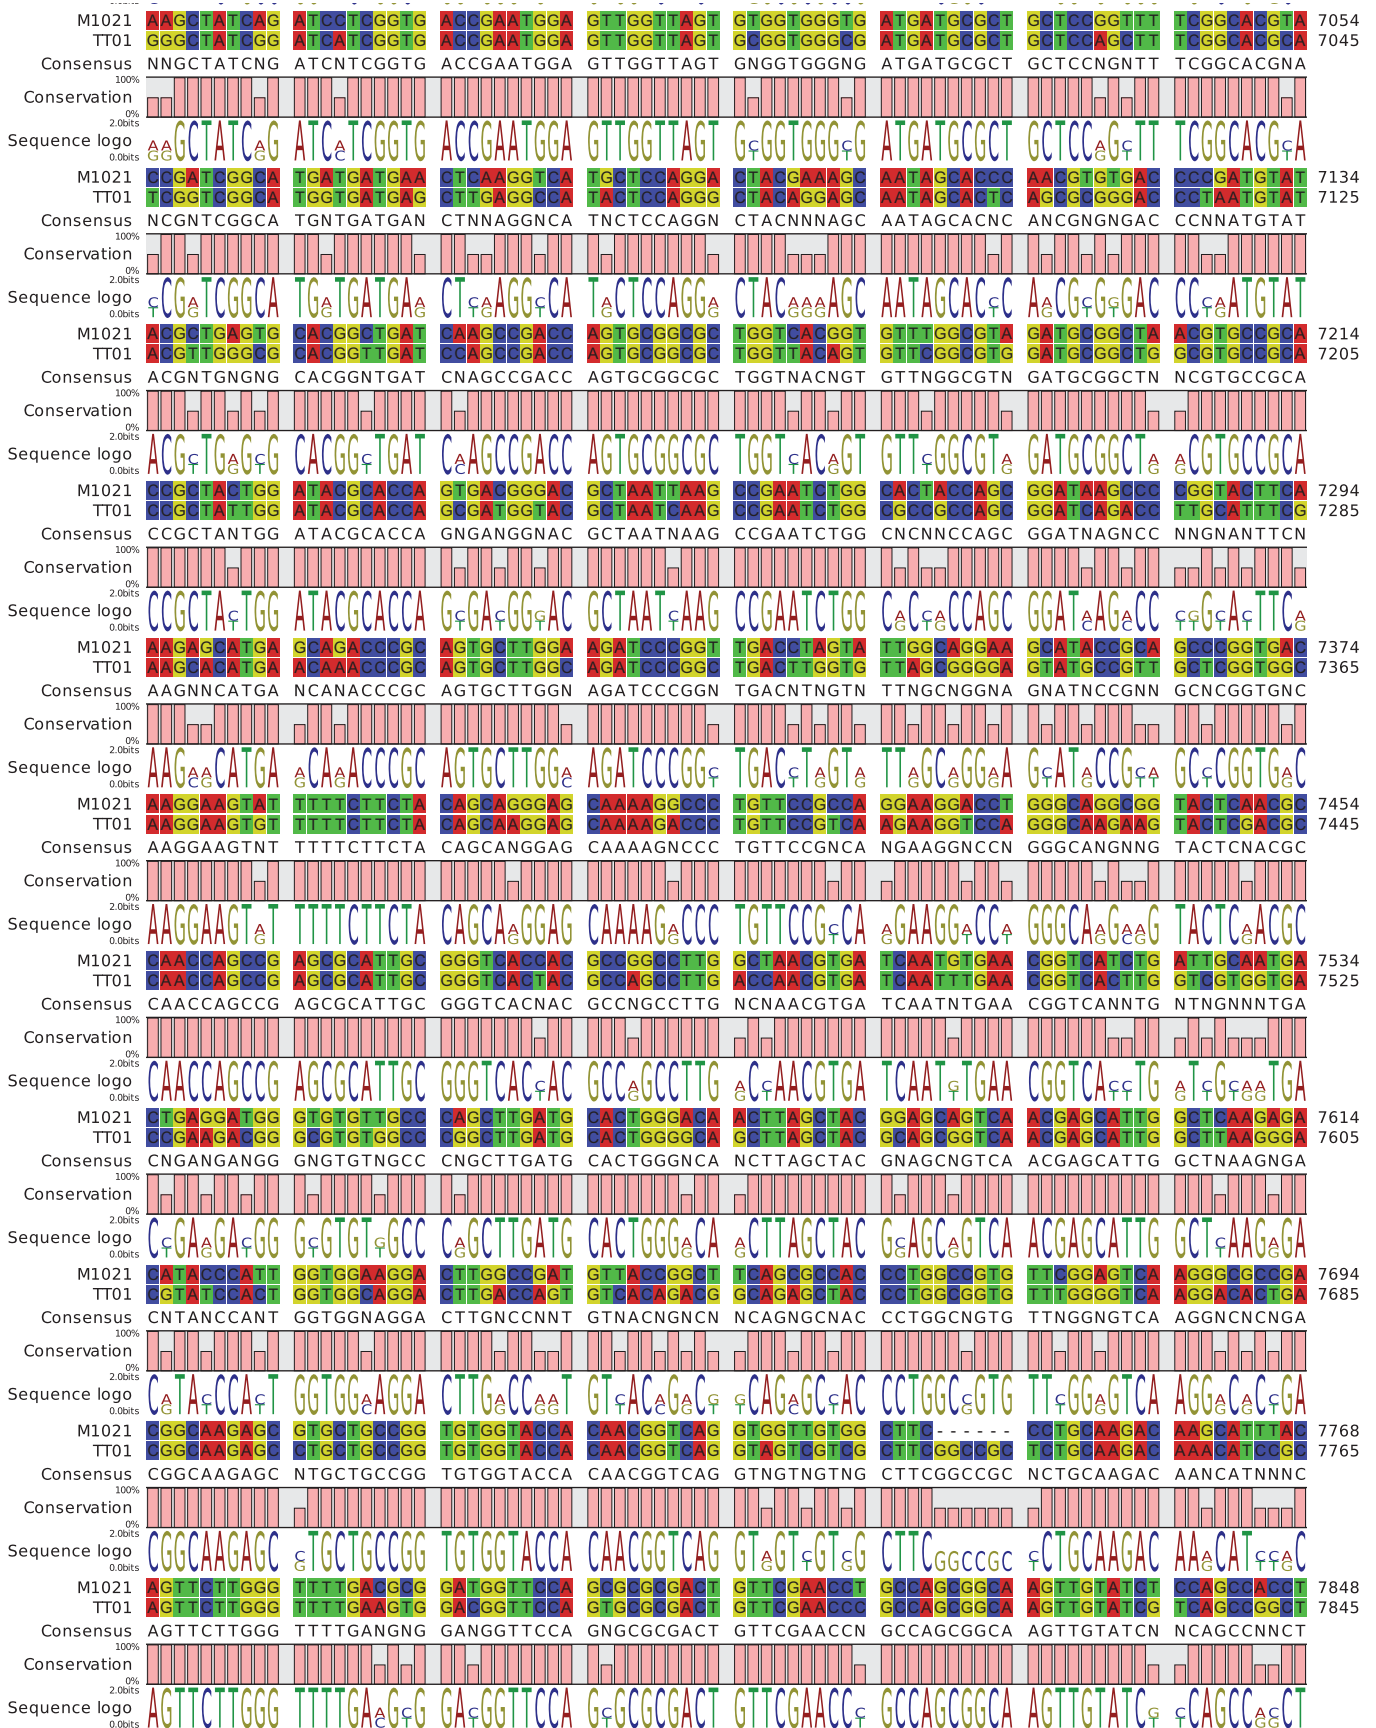

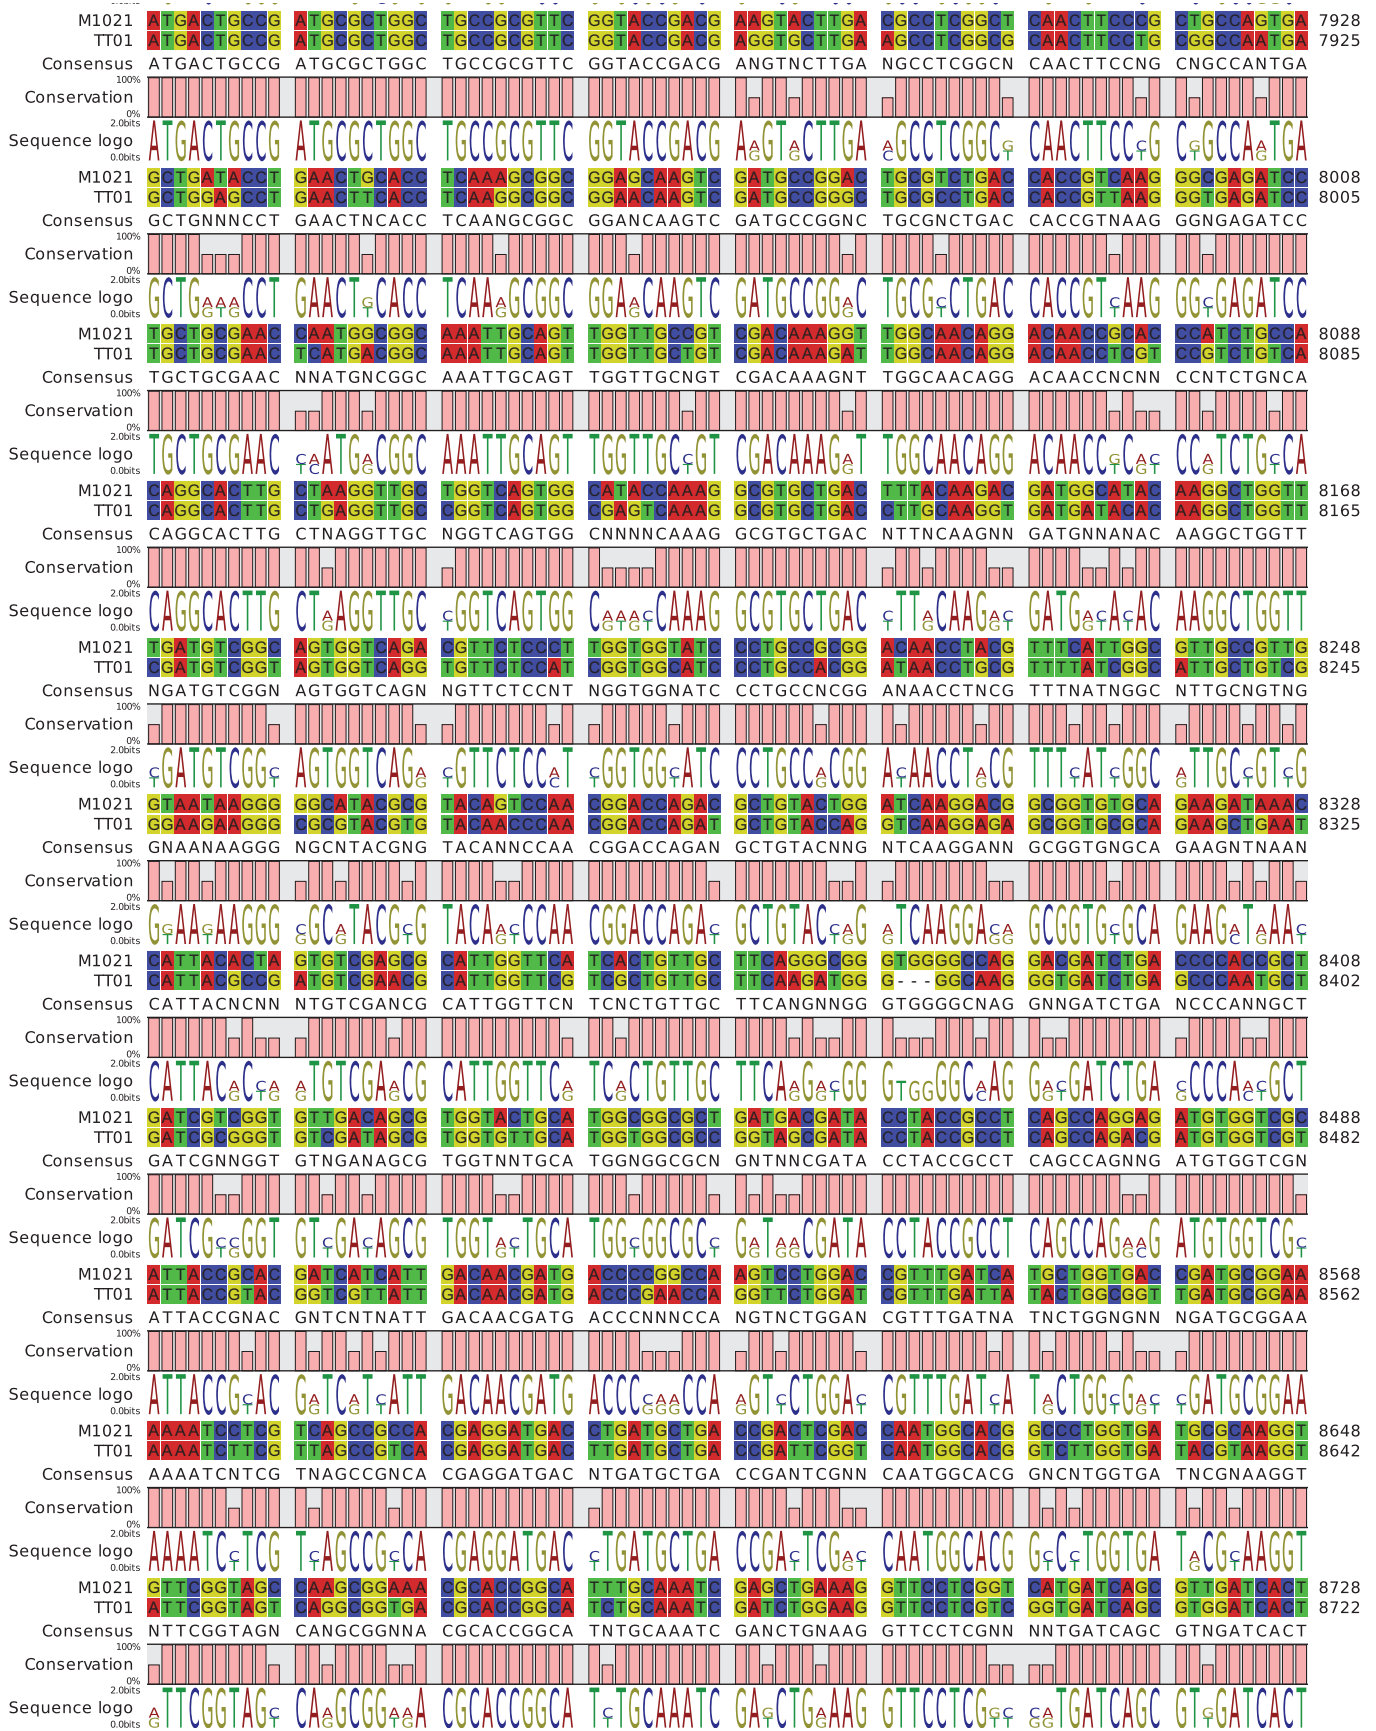

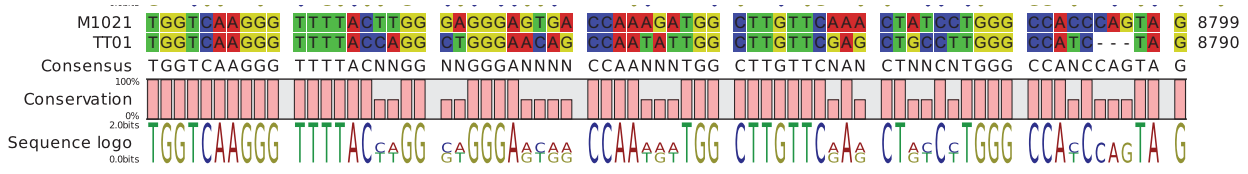

**Figure S2.** Diagrammatic presentation of domain structure of the Mcf insecticidal toxin from *P. temperata* M1021 and showing the relative location of three potential functional domains in the Mcf protein. **(I)** First, the N-terminus carries a BH3-like consensus motif, suggesting the protein may be pro-apoptotic; **(II)** A centrally located domain with similarity to the translocation domain of *C. difficile* toxin B; **(III)** The C-terminal domain carrying a sequence repeated in the C-terminus of ApxIVA from *Actinobacillus pleuropneumoniae*, an RTX-like toxin.

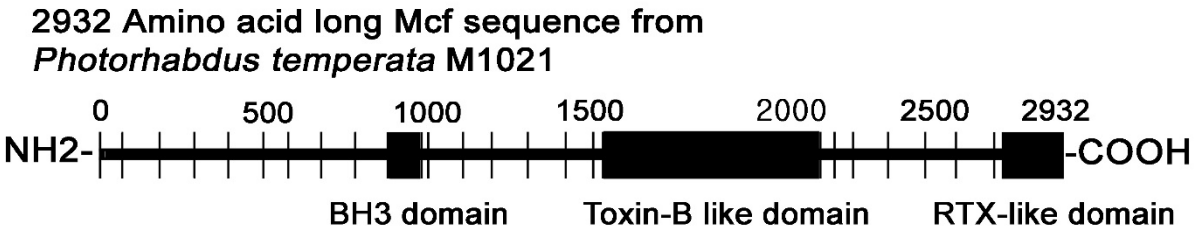

**(I) BH3 domain consensus with Mcf**

Mcf - LKAGLASVGDGFESR  
 BH3- LXXXLXXVGDDLDLN

**(II) Toxin-B domain similarity with Mcf**

|          |      |                                        |                                     |                                     |                                                   |           |                                 |                                          |                              |                |       |        |        |        |      |
|----------|------|----------------------------------------|-------------------------------------|-------------------------------------|---------------------------------------------------|-----------|---------------------------------|------------------------------------------|------------------------------|----------------|-------|--------|--------|--------|------|
| Toxin B- | 861  | (2)                                    | .IESISDALCDLKQNELEDSEHIFISFEDISEIDE | GFSIRFIN                            | KETGESIFVETEKTIFSEYANHIT                          | 926       |                                 |                                          |                              |                |       |        |        |        |      |
| Mcf-     | 1614 | (1)                                    | .GARFEVASARLAQEHQLDSRWLPIIATTEDDQGE | (1)                                 | .RYRVQFIN                                         | (1)       | .DQPEQTRWLIITSDSTFEVFRFRFD      | 681                                      |                              |                |       |        |        |        |      |
| Toxin B- | 927  | EEI                                    | SKIKG                               | (14)                                | .NLDTTHEVNTLNAAFFIQSLIE                           | (1)       | .NS                             | (7)                                      | .LSVAMGVQVYAQLFSTGLNITDAAKV  | 1007           |       |        |        |        |      |
| Mcf-     | 1682 | EEM                                    | AVLNE                               | (13)                                | .GVGEAAPVDGLNAGFAVQTLIQ                           | (9)       | .AA                             | (7)                                      | .LATALKVHSYLNLVQMAHGGVQDIARV | 1769           |       |        |        |        |      |
| Toxin B- | 1008 | VELVSTA                                | (4)                                 | .IDLLPTL                            | SEG                                               | L         | PIIATIIDGVSLGAAIKELSETSDPLLRQEI | EAKIGIMAV                                | 1069                         |                |       |        |        |        |      |
| Mcf-     | 1770 | TALVRTA                                | (4)                                 | .VVAAETS                            | LKD                                               | (9)       | .N                              | EGAGVLFGGAMVGLDAYELAHAENDVQKAVFGTQLAFDSA | 1840                         |                |       |        |        |        |      |
| Toxin B- | 1070 | NLTTATTAXI                             | (3)                                 | .LGIASG                             | FSILLVPLAGISAGIPSLVNNELVLRDKATKVVVDYFQHVSLVTEGVF  | 1136      |                                 |                                          |                              |                |       |        |        |        |      |
| Mcf-     | 1841 | SFVTGAAGVG                             | (6)                                 | .STAGAV                             | LGGASVILGGLAVGFTALAAQAFGAVAEADAKAVGRYFDIVDKAYKNGY | 1910      |                                 |                                          |                              |                |       |        |        |        |      |
| Toxin B- | 1137 | TLLD                                   | (2)                                 | .INMPQDDLVISEIDFNNSIVLKGCEIWR       | (15)                                              | .FF       | SA                              | PSITYRE                                  | (2)                          | .HLSIVDVL      | 1207  |        |        |        |      |
| Mcf-     | 1911 | RYDN                                   | (3)                                 | .VLVPLAGAVIKSLDLRKHQISFDSOYIYR      | (13)                                              | .FF       | (5)                             | .PR                                      | MVHDRGO                      | AIEVRSIG       | 1984  |        |        |        |      |
| Toxin B- | 1208 | VQKZELDLS                              | (2)                                 | .DLMVLPNAPNRV                       | FAWETGWTPLGRSLENDGKLL                             | DRIRDNY   | (3)                             | .F                                       | (3)                          | .YFA           | 1268  |        |        |        |      |
| Mcf-     | 1985 | YKDISRPLE                              | (4)                                 | .NVVILPGTIPKSY                      | ISYEYMLLPGATTIRHDAGFDVI                           | RRLEEDK   | (2)                             | .F                                       | (3)                          | .FYI           | 2046  |        |        |        |      |
| Toxin B- | 1269 | FIADALITLKPREDTINIRINLDSNTRSFIVPIITTEY | (1)                                 | .REKLSYSFYGSGGTYALSLSQY             | (4)                                               | .NI       | EL                              | 1338                                     |                              |                |       |        |        |        |      |
| Mcf-     | 2047 | FPGEETIRRIHHEYVDTPIEVVDQRNRQLVVPPELPEL | HSEFLRYEIKGAGGEYLIGLNEG             | (3)                                 | .KL                                               | TS        | 2114                            |                                          |                              |                |       |        |        |        |      |
| Toxin B- | 1339 | S                                      | ES                                  | (2)                                 | .WIIDVD                                           | (3)       | .RDVTI                          | ESDKIKKGDIEGI                            | (7)                          | .ENKIL         | (1)   | .SHEIN | (26)   | .1416  |      |
| Mcf-     | 2115 | (2)                                    | .A                                  | SA                                  | (3)                                               | .WIIDSS   | (2)                             | .ASDSI                                   | (2)                          | .SKNQLVVGVVVEL | (6)   | .QVLVN | (1)    | .KGEVR | 2169 |
| Toxin B- | 1417 | EVDLLS                                 | (3)                                 | .KL                                 | (2)                                               | .SGELKILH | (1)                             | .NSNHQQ                                  | KIDYIGFENSELQKNIPY           | (6)            | .GKEN | (5)    | .STKEG | 1482   |      |
| Mcf-     | 2170 | EVDVAG                                 | (2)                                 | .TQ                                 | (2)                                               | .SEDAGKQ  | (1)                             | .PGQQIEQ                                 | HLSDLAKAHQLHGQYV             | VENY           | SHNGR | 2223   |        |        |      |
| Toxin B- | 1483 | LFSVSELPDVLISKVYM                      | (1)                                 | .DSKPSFGYYSNNLKDVKVITKDNVNIITGYLLKD | 1534                                              |           |                                 |                                          |                              |                |       |        |        |        |      |
| Mcf-     | 2224 | DVGRAFYDVGKERMLFT                      | NTTHEQTRHAQLGAVMGDHAIFYDADNAAARVD   | 2274                                |                                                   |           |                                 |                                          |                              |                |       |        |        |        |      |

**(III) RTX-like domain consensus with Mcf**

|      |      |                                                                                                                                                                                                                                                                                                                                                                                                                                                                                                                                                                                                                                                                                                                                                                                                                                                                                                                                                                                                                                                                                                                                                                                                                                                                                                                                                                                                                                                                                                                                                                                                                                                                                                                                                                                                                                                                                                                                                                                                                                                                                                                                                                                                                                                                                                                                                                                                                                                                                                                                                                                                                                                                                                                                                                                                                                                                                                                                                                                                                                                                                                                                                                                                                                                                                                                                                                                                                                                                                                                                                                                                                                                                               |      |
|------|------|-------------------------------------------------------------------------------------------------------------------------------------------------------------------------------------------------------------------------------------------------------------------------------------------------------------------------------------------------------------------------------------------------------------------------------------------------------------------------------------------------------------------------------------------------------------------------------------------------------------------------------------------------------------------------------------------------------------------------------------------------------------------------------------------------------------------------------------------------------------------------------------------------------------------------------------------------------------------------------------------------------------------------------------------------------------------------------------------------------------------------------------------------------------------------------------------------------------------------------------------------------------------------------------------------------------------------------------------------------------------------------------------------------------------------------------------------------------------------------------------------------------------------------------------------------------------------------------------------------------------------------------------------------------------------------------------------------------------------------------------------------------------------------------------------------------------------------------------------------------------------------------------------------------------------------------------------------------------------------------------------------------------------------------------------------------------------------------------------------------------------------------------------------------------------------------------------------------------------------------------------------------------------------------------------------------------------------------------------------------------------------------------------------------------------------------------------------------------------------------------------------------------------------------------------------------------------------------------------------------------------------------------------------------------------------------------------------------------------------------------------------------------------------------------------------------------------------------------------------------------------------------------------------------------------------------------------------------------------------------------------------------------------------------------------------------------------------------------------------------------------------------------------------------------------------------------------------------------------------------------------------------------------------------------------------------------------------------------------------------------------------------------------------------------------------------------------------------------------------------------------------------------------------------------------------------------------------------------------------------------------------------------------------------------------------|------|
| Mcf- | 2556 | <span style="border: 1px solid black; padding: 2px;">L</span> <span style="border: 1px solid black; padding: 2px;">A</span> <span style="border: 1px solid black; padding: 2px;">V</span> <span style="border: 1px solid black; padding: 2px;">F</span> <span style="border: 1px solid black; padding: 2px;">G</span> <span style="border: 1px solid black; padding: 2px;">V</span> <span style="border: 1px solid black; padding: 2px;">K</span> <span style="border: 1px solid black; padding: 2px;">G</span> <span style="border: 1px solid black; padding: 2px;">A</span> <span style="border: 1px solid black; padding: 2px;">D</span> <span style="border: 1px solid black; padding: 2px;">K</span> <span style="border: 1px solid black; padding: 2px;">S</span> <span style="border: 1px solid black; padding: 2px;">V</span> <span style="border: 1px solid black; padding: 2px;">L</span> <span style="border: 1px solid black; padding: 2px;">P</span> <span style="border: 1px solid black; padding: 2px;">V</span> <span style="border: 1px solid black; padding: 2px;">W</span> <span style="border: 1px solid black; padding: 2px;">Y</span> <span style="border: 1px solid black; padding: 2px;">H</span> <span style="border: 1px solid black; padding: 2px;">N</span> <span style="border: 1px solid black; padding: 2px;">G</span> <span style="border: 1px solid black; padding: 2px;">Q</span> <span style="border: 1px solid black; padding: 2px;">V</span> <span style="border: 1px solid black; padding: 2px;">V</span> <span style="border: 1px solid black; padding: 2px;">M</span> <span style="border: 1px solid black; padding: 2px;">A</span> <span style="border: 1px solid black; padding: 2px;">S</span> <span style="border: 1px solid black; padding: 2px;">L</span> <span style="border: 1px solid black; padding: 2px;">Q</span> <span style="border: 1px solid black; padding: 2px;">D</span> <span style="border: 1px solid black; padding: 2px;">K</span> <span style="border: 1px solid black; padding: 2px;">H</span> <span style="border: 1px solid black; padding: 2px;">L</span> <span style="border: 1px solid black; padding: 2px;">Q</span> <span style="border: 1px solid black; padding: 2px;">F</span> <span style="border: 1px solid black; padding: 2px;">L</span> <span style="border: 1px solid black; padding: 2px;">G</span> <span style="border: 1px solid black; padding: 2px;">F</span> <span style="border: 1px solid black; padding: 2px;">D</span> <span style="border: 1px solid black; padding: 2px;">A</span> <span style="border: 1px solid black; padding: 2px;">D</span> <span style="border: 1px solid black; padding: 2px;">G</span> <span style="border: 1px solid black; padding: 2px;">S</span> <span style="border: 1px solid black; padding: 2px;">S</span> <span style="border: 1px solid black; padding: 2px;">A</span> <span style="border: 1px solid black; padding: 2px;">R</span> <span style="border: 1px solid black; padding: 2px;">L</span> <span style="border: 1px solid black; padding: 2px;">F</span> <span style="border: 1px solid black; padding: 2px;">E</span> <span style="border: 1px solid black; padding: 2px;">P</span> <span style="border: 1px solid black; padding: 2px;">A</span> <span style="border: 1px solid black; padding: 2px;">S</span> <span style="border: 1px solid black; padding: 2px;">G</span> <span style="border: 1px solid black; padding: 2px;">K</span> <span style="border: 1px solid black; padding: 2px;">L</span> <span style="border: 1px solid black; padding: 2px;">Y</span> <span style="border: 1px solid black; padding: 2px;">L</span> | 2613 |
| RTX- | 483  | <span style="border: 1px solid black; padding: 2px;">L</span> <span style="border: 1px solid black; padding: 2px;">A</span> <span style="border: 1px solid black; padding: 2px;">G</span> <span style="border: 1px solid black; padding: 2px;">I</span> <span style="border: 1px solid black; padding: 2px;">T</span> <span style="border: 1px solid black; padding: 2px;">R</span> <span style="border: 1px solid black; padding: 2px;">K</span> <span style="border: 1px solid black; padding: 2px;">G</span> <span style="border: 1px solid black; padding: 2px;">A</span> <span style="border: 1px solid black; padding: 2px;">D</span> <span style="border: 1px solid black; padding: 2px;">A</span> <span style="border: 1px solid black; padding: 2px;">K</span> <span style="border: 1px solid black; padding: 2px;">S</span>                                                                                                                                                                                                                                                                                                                                                                                                                                                                                                                                                                                                                                                                                                                                                                                                                                                                                                                                                                                                                                                                                                                                                                                                                                                                                                                                                                                                                                                                                                                                                                                                                                                                                                                                                                                                                                                                                                                                                                                                                                                                                                                                                                                                                                                                                                                                                                                                                                                                                                                                                                                                                                                                                                                                                                                                                                         | 530  |
| Mcf- | 2789 | <span style="border: 1px solid black; padding: 2px;">L</span> <span style="border: 1px solid black; padding: 2px;">L</span> <span style="border: 1px solid black; padding: 2px;">G</span> <span style="border: 1px solid black; padding: 2px;">G</span> <span style="border: 1px solid black; padding: 2px;">N</span> <span style="border: 1px solid black; padding: 2px;">G</span> <span style="border: 1px solid black; padding: 2px;">D</span>                                                                                                                                                                                                                                                                                                                                                                                                                                                                                                                                                                                                                                                                                                                                                                                                                                                                                                                                                                                                                                                                                                                                                                                                                                                                                                                                                                                                                                                                                                                                                                                                                                                                                                                                                                                                                                                                                                                                                                                                                                                                                                                                                                                                                                                                                                                                                                                                                                                                                                                                                                                                                                                                                                                                                                                                                                                                                                                                                                                                                                                                                                                                                                                                                             | 2843 |
| RTX- | 810  | <span style="border: 1px solid black; padding: 2px;">V</span> <span style="border: 1px solid black; padding: 2px;">L</span> <span style="border: 1px solid black; padding: 2px;">L</span> <span style="border: 1px solid black; padding: 2px;">G</span> <span style="border: 1px solid black; padding: 2px;">G</span> <span style="border: 1px solid black; padding: 2px;">A</span> <span style="border: 1px solid black; padding: 2px;">N</span> <span style="border: 1px solid black; padding: 2px;">D</span> <span style="border: 1px solid black; padding: 2px;">I</span> <span style="border: 1px solid black; padding: 2px;">L</span> <span style="border: 1px solid black; padding: 2px;">Y</span> <span style="border: 1px solid black; padding: 2px;">G</span> <span style="border: 1px solid black; padding: 2px;">S</span> <span style="border: 1px solid black; padding: 2px;">D</span> <span style="border: 1px solid black; padding: 2px;">G</span> <span style="border: 1px solid black; padding: 2px;">T</span> <span style="border: 1px solid black; padding: 2px;">N</span> <span style="border: 1px solid black; padding: 2px;">L</span> <span style="border: 1px solid black; padding: 2px;">F</span> <span style="border: 1px solid black; padding: 2px;">D</span> <span style="border: 1px solid black; padding: 2px;">G</span> <span style="border: 1px solid black; padding: 2px;">G</span> <span style="border: 1px solid black; padding: 2px;">V</span> <span style="border: 1px solid black; padding: 2px;">G</span> <span style="border: 1px solid black; padding: 2px;">N</span> <span style="border: 1px solid black; padding: 2px;">D</span> <span style="border: 1px solid black; padding: 2px;">K</span> <span style="border: 1px solid black; padding: 2px;">I</span> <span style="border: 1px solid black; padding: 2px;">Y</span> <span style="border: 1px solid black; padding: 2px;">G</span> <span style="border: 1px solid black; padding: 2px;">G</span> <span style="border: 1px solid black; padding: 2px;">K</span> <span style="border: 1px solid black; padding: 2px;">D</span> <span style="border: 1px solid black; padding: 2px;">I</span> <span style="border: 1px solid black; padding: 2px;">Y</span> <span style="border: 1px solid black; padding: 2px;">R</span> <span style="border: 1px solid black; padding: 2px;">M</span> <span style="border: 1px solid black; padding: 2px;">S</span> <span style="border: 1px solid black; padding: 2px;">K</span> <span style="border: 1px solid black; padding: 2px;">E</span> <span style="border: 1px solid black; padding: 2px; padding-right: 5px;">Y</span> <span style="border: 1px solid black; padding: 2px;">G</span> <span style="border: 1px solid black; padding: 2px;">F</span> <span style="border: 1px solid black; padding: 2px;">H</span>                                                                                                                                                                                                                                                                                                                                                                                                                                                                                                                                                                                                                                                                                                                                                                                                                   | 866  |
| Mcf- | 2844 | <span style="border: 1px solid black; padding: 2px;">V</span> <span style="border: 1px solid black; padding: 2px;">L</span> <span style="border: 1px solid black; padding: 2px;">D</span> <span style="border: 1px solid black; padding: 2px;">R</span> <span style="border: 1px solid black; padding: 2px;">L</span> <span style="border: 1px solid black; padding: 2px;">I</span> <span style="border: 1px solid black; padding: 2px;">M</span> <span style="border: 1px solid black; padding: 2px;">L</span> <span style="border: 1px solid black; padding: 2px;">V</span> <span style="border: 1px solid black; padding: 2px;">T</span> <span style="border: 1px solid black; padding: 2px;">D</span> <span style="border: 1px solid black; padding: 2px;">A</span> <span style="border: 1px solid black; padding: 2px;">E</span> <span style="border: 1px solid black; padding: 2px;">K</span> <span style="border: 1px solid black; padding: 2px;">I</span> <span style="border: 1px solid black; padding: 2px;">L</span> <span style="border: 1px solid black; padding: 2px;">V</span> <span style="border: 1px solid black; padding: 2px;">S</span> <span style="border: 1px solid black; padding: 2px;">P</span> <span style="border: 1px solid black; padding: 2px;">H</span> <span style="border: 1px solid black; padding: 2px;">E</span> <span style="border: 1px solid black; padding: 2px;">D</span> <span style="border: 1px solid black; padding: 2px;">D</span> <span style="border: 1px solid black; padding: 2px;">L</span> <span style="border: 1px solid black; padding: 2px;">M</span> <span style="border: 1px solid black; padding: 2px;">L</span> <span style="border: 1px solid black; padding: 2px;">T</span> <span style="border: 1px solid black; padding: 2px;">D</span> <span style="border: 1px solid black; padding: 2px;">S</span> <span style="border: 1px solid black; padding: 2px;">T</span> <span style="border: 1px solid black; padding: 2px;">N</span> <span style="border: 1px solid black; padding: 2px;">G</span> <span style="border: 1px solid black; padding: 2px;">T</span>                                                                                                                                                                                                                                                                                                                                                                                                                                                                                                                                                                                                                                                                                                                                                                                                                                                                                                                                                                                                                                                                                                                                                                                                                                                                                                                                                                                                                                                                                                                                                 | 2876 |
| RTX- | 867  | <span style="border: 1px solid black; padding: 2px;">T</span> <span style="border: 1px solid black; padding: 2px;">L</span> <span style="border: 1px solid black; padding: 2px;">L</span> <span style="border: 1px solid black; padding: 2px;">S</span> <span style="border: 1px solid black; padding: 2px;">D</span> <span style="border: 1px solid black; padding: 2px;">L</span> <span style="border: 1px solid black; padding: 2px;">S</span> <span style="border: 1px solid black; padding: 2px;">F</span> <span style="border: 1px solid black; padding: 2px;">K</span> <span style="border: 1px solid black; padding: 2px;">V</span> <span style="border: 1px solid black; padding: 2px;">G</span> <span style="border: 1px solid black; padding: 2px;">F</span>                                                                                                                                                                                                                                                                                                                                                                                                                                                                                                                                                                                                                                                                                                                                                                                                                                                                                                                                                                                                                                                                                                                                                                                                                                                                                                                                                                                                                                                                                                                                                                                                                                                                                                                                                                                                                                                                                                                                                                                                                                                                                                                                                                                                                                                                                                                                                                                                                                                                                                                                                                                                                                                                                                                                                                                                                                                                                                       | 896  |
